# Supplementary material for: Metal-free regioselective C-3 nitration of quinoline N-oxides with tert-butyl nitrite
Source: Royal Society of Chemistry journal article supplement (doi:10.1039/c5ra04632g), 2015-01-01

## **Electronic Supplementary Information**

### **Metal-free regioselective C-3 nitration of quinoline *N*-oxides with *tert*-butyl nitrite**

Jingjing Zhao,<sup>ab</sup> Pan Li,<sup>a</sup> Chungu Xia<sup>a</sup> and Fuwei Li<sup>\*a</sup>

† State Key Laboratory for Oxo Synthesis and Selective Oxidation, Lanzhou Institute of Chemical Physics, Chinese Academy of Sciences, Lanzhou 730000, P. R. China

‡ Graduate University of Chinese Academy of Sciences, Beijing 100049, P. R. China.

Email: [fuweili@licp.cas.cn](mailto:fuweili@licp.cas.cn)

#### **Electronic Supplementary Information Contents:**

|                                                                                         |            |
|-----------------------------------------------------------------------------------------|------------|
| General Information.....                                                                | ESI2       |
| General Procedure for Quinoline <i>N</i> -Oxide Derivatives.....                        | ESI2       |
| Characterization Data of the Quinoline <i>N</i> -Oxide Derivatives.....                 | ESI2-ESI4  |
| General Procedure for 3-Nitroquinoline <i>N</i> -Oxide Derivatives.....                 | ESI4       |
| Characterization Data of the 3-Nitroquinoline <i>N</i> -Oxide Derivatives Products..... | ESI4-ESI6  |
| Gram Scale Synthesis of 3-Nitroquinoline <i>N</i> -Oxide <b>2a</b> .....                | ESI6       |
| General Procedure for Transformations of 3-Nitroquinoline <i>N</i> -Oxide.....          | ESI6-ESI7  |
| General Procedure for Radical Trapping Experiments.....                                 | ESI7       |
| Reference.....                                                                          | ESI8       |
| Copies of <sup>1</sup> H and <sup>13</sup> C NMR Spectra of the Products.....           | ESI9-ESI23 |

## General Information:

All reagents purchased from commercial sources were used as received. Quinoline derivatives were purchased from Adamas-beta. The silica gel for column chromatography was supplied as 300–400 meshes. The  $^1\text{H}$  and  $^{13}\text{C}$  NMR spectra were recorded on a Bruker AVANCE III spectrometer and are referenced to the residual solvent signals (7.26 ppm for  $^1\text{H}$  and 77.0 ppm for  $^{13}\text{C}$  in  $\text{CDCl}_3$ , 2.50 ppm for  $^1\text{H}$  and 39.5 ppm for  $^{13}\text{C}$  in  $d_6$ -DMSO). The HRMS spectra were recorded on a Bruker MicroTOF QII spectrometer.

## General Procedure for Quinoline *N*-Oxide Derivatives:

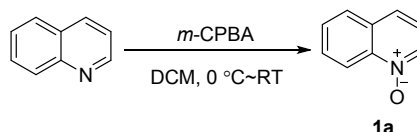

Under vigorous magnetic stirring, 3-chloroperbenzoic acid (*m*-CPBA) (345 mg, 2 mmol) in  $\text{CH}_2\text{Cl}_2$  (10 mL) was dropped into solution of quinoline derivatives (2 mmol) in  $\text{CH}_2\text{Cl}_2$  (10 mL) cooled to  $0\text{ }^\circ\text{C}$ . After the completion of this course, the reaction mixture was allowed up to room temperature and stirred overnight. An aqueous solution of saturated  $\text{NaHCO}_3$  was added to the mixture to neutralize residual *m*-CPBA. The resulting mixture was extracted with  $\text{CH}_2\text{Cl}_2$  ( $3 \times 10\text{ mL}$ ). The organic phase were combined and washed with saturated  $\text{NaCl}$  solution ( $3 \times 5\text{ mL}$ ). The organic layer was dried over anhydrous  $\text{Na}_2\text{SO}_4$ , filtered and evaporated under reduced pressure to give crude products, which were purified by column chromatography (silica gel 300–400 mesh, EA: MeOH (8:1) as eluent). The products were identified by  $^1\text{H}$  NMR and  $^{13}\text{C}$  NMR spectra and compared to the previous literatures. Following the above procedure, the following Quinoline *N*-Oxide Derivatives were prepared:

## Characterization Data of the Quinoline *N*-Oxide Derivatives:

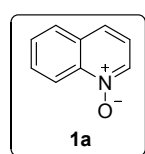

$^1\text{H}$  NMR (400 MHz,  $\text{CDCl}_3$ )  $\delta$  8.72 (d,  $J = 8.8\text{ Hz}$ , 1 H), 8.52 (dd,  $J = 6.0, 0.6\text{ Hz}$ , 1 H), 7.85 (d,  $J = 8.1\text{ Hz}$ , 1 H), 7.79–7.70 (m, 2 H), 7.67–7.60 (m, 1 H), 7.28 (dd,  $J = 8.5, 6.2\text{ Hz}$ , 1 H);  $^{13}\text{C}$  NMR (100 MHz,  $\text{CDCl}_3$ )  $\delta$  141.5, 135.6, 130.46, 130.45, 128.7, 128.1, 126.1, 120.9, 119.7.

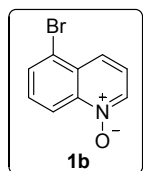

$^1\text{H}$  NMR (400 MHz,  $\text{CDCl}_3$ )  $\delta$  8.72 (d,  $J = 8.9\text{ Hz}$ , 1 H), 8.53 (d,  $J = 6.0\text{ Hz}$ , 1 H), 8.06 (d,  $J = 8.8\text{ Hz}$ , 1 H), 7.89 (dd,  $J = 7.5, 0.9\text{ Hz}$ , 1 H), 7.57 (dd,  $J = 8.8, 7.6\text{ Hz}$ , 1 H), 7.37 (dd,  $J = 8.8, 6.1\text{ Hz}$ , 1 H);  $^{13}\text{C}$  NMR (100 MHz,  $\text{CDCl}_3$ )  $\delta$  142.6, 135.8, 132.7, 130.3, 129.9, 125.1, 122.3, 121.7, 119.7.

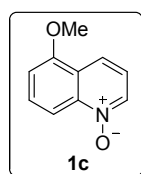

$^1\text{H}$  NMR (400 MHz,  $\text{DMSO-}d_6$ )  $\delta$  8.58 (d,  $J = 6.0\text{ Hz}$ , 1 H), 8.07 (d,  $J = 8.8\text{ Hz}$ , 1 H), 8.01 (d,  $J = 8.6\text{ Hz}$ , 1 H), 7.72 (t,  $J = 8.3\text{ Hz}$ , 1 H), 7.42 (dd,  $J = 8.6, 6.1\text{ Hz}$ , 1 H), 7.19 (d,  $J = 7.8\text{ Hz}$ , 1 H), 4.00 (s, 3 H);  $^{13}\text{C}$  NMR (100 MHz,  $\text{DMSO-}d_6$ )  $\delta$  155.3, 141.8, 135.7, 130.6, 122.6, 120.9, 119.0, 110.6, 107.3, 56.4.

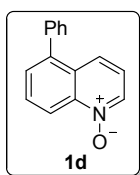

$^1\text{H}$  NMR (400 MHz,  $\text{CDCl}_3$ )  $\delta$  8.81 (d,  $J = 8.8$  Hz, 1 H), 8.55 (dd,  $J = 6.0, 0.8$  Hz, 1 H), 7.83–7.75 (m, 2 H), 7.59 (dd,  $J = 7.1, 1.1$  Hz, 1 H), 7.54–7.41 (m, 5 H), 7.23 (dd,  $J = 8.8, 6.0$  Hz, 1 H);  $^{13}\text{C}$  NMR (100 MHz,  $\text{CDCl}_3$ )  $\delta$  142.1, 141.1, 138.6, 135.3, 129.9, 129.8, 129.5, 129.2, 128.6, 128.1, 124.5, 120.6, 119.1.

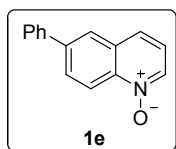

$^1\text{H}$  NMR (400 MHz,  $\text{CDCl}_3$ )  $\delta$  8.80 (d,  $J = 8.8$  Hz, 1 H), 8.53 (d,  $J = 5.7$  Hz, 1 H), 8.05–7.98 (m, 2 H), 7.79 (d,  $J = 8.5$  Hz, 1 H), 7.72–7.65 (m, 2 H), 7.52–7.48 (m, 2 H), 7.45–7.41 (m, 1 H), 7.31 (dd,  $J = 8.4, 6.1$  Hz, 1 H);  $^{13}\text{C}$  NMR (100 MHz,  $\text{CDCl}_3$ )  $\delta$  141.7, 140.8, 139.2, 135.5, 130.8, 130.1, 129.1, 128.3, 127.4, 126.2, 125.6, 121.3, 120.3.

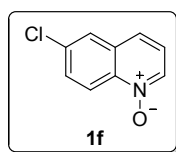

$^1\text{H}$  NMR (400 MHz,  $\text{CDCl}_3$ )  $\delta$  8.63 (d,  $J = 9.3$  Hz, 1 H), 8.45 (d,  $J = 6.0$  Hz, 1 H), 7.79 (d,  $J = 2.1$  Hz, 1 H), 7.64–7.57 (m, 2 H), 7.28 (dd,  $J = 8.4, 6.2$  Hz, 1 H);  $^{13}\text{C}$  NMR (100 MHz,  $\text{CDCl}_3$ )  $\delta$  139.9, 135.5, 134.9, 131.1, 130.9, 126.6, 124.5, 122.1, 121.5.

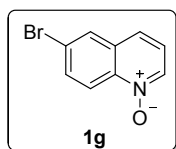

$^1\text{H}$  NMR (400 MHz,  $\text{CDCl}_3$ )  $\delta$  8.55 (d,  $J = 9.3$  Hz, 1 H), 8.47 (d,  $J = 5.6$  Hz, 1 H), 7.97 (d,  $J = 2.0$  Hz, 1 H), 7.75 (dd,  $J = 9.3, 2.0$  Hz, 1 H), 7.59 (d,  $J = 8.5$  Hz, 1 H), 7.27 (dd,  $J = 8.5, 6.1$  Hz, 1 H);  $^{13}\text{C}$  NMR (100 MHz,  $\text{CDCl}_3$ )  $\delta$  140.2, 135.7, 133.6, 131.4, 130.0, 124.5, 123.1, 122.1, 121.6.

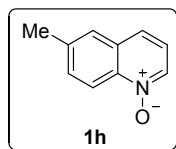

$^1\text{H}$  NMR (400 MHz,  $\text{CDCl}_3$ )  $\delta$  8.61 (d,  $J = 8.9$  Hz, 1 H), 8.44 (d,  $J = 5.9$  Hz, 1 H), 7.66–7.58 (m, 2 H), 7.55 (dd,  $J = 8.9, 1.6$  Hz, 1 H), 7.22 (dd,  $J = 8.4, 6.0$  Hz, 1 H), 2.48 (s, 3 H);  $^{13}\text{C}$  NMR (100 MHz,  $\text{CDCl}_3$ )  $\delta$  140.0, 139.0, 134.9, 132.5, 130.6, 126.9, 125.4, 120.9, 119.5, 21.4.

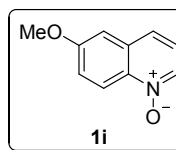

$^1\text{H}$  NMR (400 MHz,  $\text{CDCl}_3$ )  $\delta$  8.60 (d,  $J = 9.5$  Hz, 1 H), 8.34 (dd,  $J = 6.0, 0.7$  Hz, 1 H), 7.57 (d,  $J = 8.5$  Hz, 1 H), 7.32 (dd,  $J = 9.5, 2.7$  Hz, 1 H), 7.19 (dd,  $J = 8.5, 6.0$  Hz, 1 H), 7.05 (d,  $J = 2.7$  Hz, 1 H), 3.88 (s, 3 H);  $^{13}\text{C}$  NMR (100 MHz,  $\text{CDCl}_3$ )  $\delta$  159.3, 137.1, 133.7, 131.9, 124.8, 122.6, 121.4, 121.3, 105.6, 55.6.

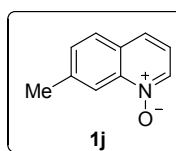

$^1\text{H}$  NMR (400 MHz,  $\text{CDCl}_3$ )  $\delta$  8.55–8.52 (m, 2 H), 7.75–7.70 (m, 2 H), 7.45 (dd,  $J = 8.3, 1.4$  Hz, 1 H), 7.22 (dd,  $J = 8.4, 6.1$  Hz, 1 H), 2.57 (s, 3 H);  $^{13}\text{C}$  NMR (100 MHz,  $\text{CDCl}_3$ )  $\delta$  141.7, 141.3, 135.9, 130.9, 128.6, 127.8, 126.4, 119.9, 118.6, 22.0.

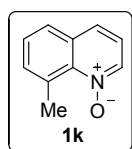

$^1\text{H}$  NMR (400 MHz,  $\text{CDCl}_3$ )  $\delta$  8.32 (dd,  $J = 6.0, 0.6$  Hz, 1 H), 7.57–7.54 (m, 2 H), 7.38–7.30 (m, 2 H), 7.10 (dd,  $J = 8.4, 6.1$  Hz, 1 H), 3.12 (s, 3 H);  $^{13}\text{C}$  NMR (100 MHz,  $\text{CDCl}_3$ )  $\delta$  141.2, 137.1, 133.4, 133.2, 132.3, 127.9, 126.7, 126.2, 120.5, 24.7.

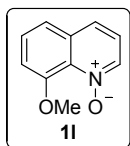

$^1\text{H}$  NMR (400 MHz,  $\text{CDCl}_3$ )  $\delta$  8.39 (dd,  $J = 6.1, 1.0$  Hz, 1 H), 7.62–7.56 (m, 1 H), 7.47–7.43 (m, 1 H), 7.35 (dd,  $J = 8.2, 1.0$  Hz, 1 H), 7.17 (dd,  $J = 8.4, 6.1$  Hz, 1 H), 7.08–7.00 (m, 1 H), 4.00 (s, 3 H);  $^{13}\text{C}$  NMR (100 MHz,  $\text{CDCl}_3$ )  $\delta$  153.6, 138.0, 134.2, 133.6, 128.6, 125.5, 121.2, 120.5, 110.9, 57.0.

### General Procedure for 3-Nitroquinoline *N*-Oxide Derivatives:

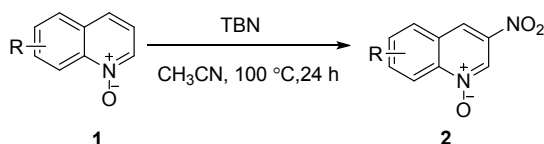

To a 15 mL sealed tube with a stir bar was added 0.3 mmol of quinoline *N*-Oxide **1**, 3 mL of  $\text{CH}_3\text{CN}$  and TBN (1.05 mmol, 3.5 equiv.), then the reaction mixture was stirred at 100 °C for 24 h, cooled to room temperature, poured into brine and extracted with EtOAc. The combined extracts were dried over  $\text{MgSO}_4$ , filtered, and evaporated. The residue was purified by column chromatography (petroleum ether/EtOAc) to afford the desired product **2**.

### Characterization Data of the 3-Nitroquinoline *N*-Oxide Derivatives Products:

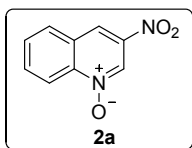

$^1\text{H}$  NMR (400 MHz,  $\text{CDCl}_3$ )  $\delta$  9.25 (d,  $J = 1.9$  Hz, 1 H), 8.78 (d,  $J = 8.8$  Hz, 1 H), 8.60 (d,  $J = 1.3$  Hz, 1 H), 8.11 (d,  $J = 8.1$  Hz, 1 H), 7.98 (ddd,  $J = 8.6, 7.0, 1.3$  Hz, 1 H), 7.89–7.78 (m, 1 H);  $^{13}\text{C}$  NMR (100 MHz,  $\text{CDCl}_3$ )  $\delta$  143.9, 141.9, 133.9, 130.8, 130.6, 129.9, 127.6, 120.8, 120.3; HRMS (ESI) Calcd for  $\text{C}_9\text{H}_7\text{N}_2\text{O}_3$  [M+H] 191.0451, Found 191.0448.<sup>[1]</sup>

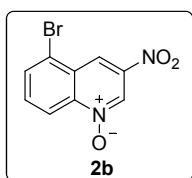

$^1\text{H}$  NMR (400 MHz,  $\text{CDCl}_3$ )  $\delta$  9.27 (d,  $J = 1.9$  Hz, 1 H), 8.93 (d,  $J = 0.9$  Hz, 1 H), 8.77 (d,  $J = 8.8$  Hz, 1 H), 8.09 (dd,  $J = 7.6, 0.8$  Hz, 1 H), 7.80 (dd,  $J = 8.8, 7.6$  Hz, 1 H);  $^{13}\text{C}$  NMR (100 MHz,  $\text{CDCl}_3$ )  $\delta$  145.2, 142.5, 134.7, 133.7, 130.2, 127.8, 125.0, 120.2, 120.0; HRMS (ESI) Calcd for  $\text{C}_9\text{H}_5\text{BrN}_2\text{NaO}_3$  [M+Na] 290.9383, Found 290.9376. [new compound]

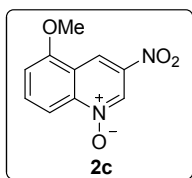

$^1\text{H}$  NMR (400 MHz,  $\text{DMSO}-d_6$ )  $\delta$  9.21 (m, 1 H), 8.69 (m, 1 H), 8.15–7.97 (m, 2 H), 7.42 (d,  $J = 7.7$  Hz, 1 H), 4.09 (s, 3 H);  $^{13}\text{C}$  NMR (100 MHz,  $\text{DMSO}-d_6$ )  $\delta$  157.2, 143.9, 141.2, 135.0, 130.1, 119.3, 115.1, 110.7, 109.6, 56.9; HRMS (ESI) Calcd for  $\text{C}_{10}\text{H}_9\text{N}_2\text{O}_4$  [M+H] 221.0557, Found 221.0553. [new compound]

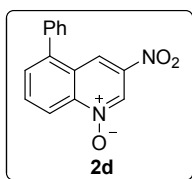

$^1\text{H}$  NMR (400 MHz,  $\text{DMSO}-d_6$ )  $\delta$  8.36 (d,  $J = 1.8$  Hz, 1 H), 7.75 (d,  $J = 8.8$  Hz, 1 H), 7.47 (s, 1 H), 7.22 (dd,  $J = 8.7, 7.4$  Hz, 1 H), 6.99 (d,  $J = 7.1$  Hz, 1 H), 6.77–6.65 (m, 5 H);  $^{13}\text{C}$  NMR (100 MHz,  $\text{DMSO}-d_6$ )  $\delta$  143.8, 143.2, 142.0, 137.1, 133.6, 131.3, 130.0, 129.5, 129.0, 128.8, 125.6, 118.7, 118.6; HRMS (ESI) Calcd for  $\text{C}_{15}\text{H}_{10}\text{N}_2\text{O}_3\text{Na}$  [M+Na] 289.0584, Found 289.0583. [new compound]

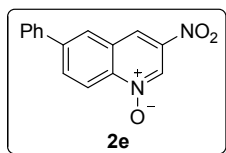

$^1\text{H}$  NMR (400 MHz, DMSO- $d_6$ )  $\delta$  8.32 (d,  $J$  = 1.9 Hz, 1 H), 8.12 (d,  $J$  = 1.6 Hz, 1 H), 7.87 (d,  $J$  = 1.9 Hz, 1 H), 7.76 (d,  $J$  = 9.1 Hz, 1 H), 7.51 (dd,  $J$  = 9.1, 2.0 Hz, 1 H), 7.03–6.96 (m, 2 H), 6.74–6.70 (m, 2 H), 6.64 (t,  $J$  = 7.3 Hz, 1 H);  $^{13}\text{C}$  NMR (100 MHz, DMSO- $d_6$ )  $\delta$  142.4, 142.3, 141.9, 137.6, 132.9, 129.6, 129.3, 128.9, 128.5, 128.1, 127.3, 121.5, 119.9; HRMS (ESI) Calcd for  $\text{C}_{15}\text{H}_{10}\text{N}_2\text{O}_3\text{Na}$  [M+Na] 289.0584, Found 289.0578. [new compound]

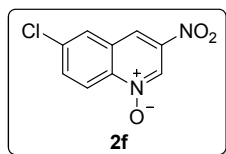

$^1\text{H}$  NMR (400 MHz,  $\text{CDCl}_3$ )  $\delta$  9.22 (d,  $J$  = 1.8 Hz, 1 H), 8.73 (d,  $J$  = 9.3 Hz, 1 H), 8.49 (s, 1 H), 8.08 (d,  $J$  = 2.1 Hz, 1 H), 7.89 (dd,  $J$  = 9.3, 2.2 Hz, 1 H);  $^{13}\text{C}$  NMR (100 MHz, DMSO)  $\delta$  143.0, 141.8, 135.2, 134.0, 130.1, 129.8, 128.7, 121.5, 120.4; HRMS (ESI) Calcd for  $\text{C}_9\text{H}_5\text{ClN}_2\text{NaO}_3$  [M+Na] 246.9880, Found 246.9881. [new compound]

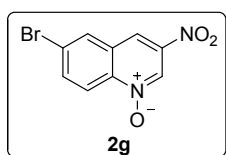

$^1\text{H}$  NMR (400 MHz, DMSO- $d_6$ )  $\delta$  9.22 (d,  $J$  = 1.6 Hz, 1 H), 8.91 (s, 1 H), 8.72 (d,  $J$  = 1.7 Hz, 1 H), 8.47 (d,  $J$  = 9.2 Hz, 1 H), 8.16 (dd,  $J$  = 9.2, 1.9 Hz, 1 H);  $^{13}\text{C}$  NMR (100 MHz, DMSO)  $\delta$  142.9, 142.0, 136.7, 133.0, 130.2, 129.1, 123.9, 121.4, 120.3; HRMS (ESI) Calcd for  $\text{C}_9\text{H}_5\text{BrN}_2\text{NaO}_3$  [M+Na] 290.9383, Found 290.9376. [new compound]

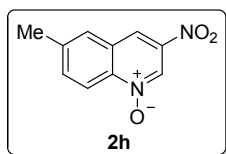

$^1\text{H}$  NMR (400 MHz,  $\text{CDCl}_3$ )  $\delta$  9.19 (d,  $J$  = 1.9 Hz, 1 H), 8.66 (d,  $J$  = 8.9 Hz, 1 H), 8.51 (d,  $J$  = 1.4 Hz, 1 H), 7.85 (s, 1 H), 7.79 (dd,  $J$  = 8.9, 1.7 Hz, 1 H), 2.61 (s, 3 H);  $^{13}\text{C}$  NMR (100 MHz,  $\text{CDCl}_3$ )  $\delta$  142.4, 142.0, 141.6, 136.1, 129.4, 129.3, 127.8, 120.4, 120.0, 21.5; HRMS (ESI) Calcd for  $\text{C}_{10}\text{H}_9\text{N}_2\text{O}_3$  [M+H] 205.0612, Found 205.0608. [new compound]

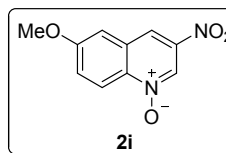

$^1\text{H}$  NMR (400 MHz, DMSO- $d_6$ )  $\delta$  9.05 (d,  $J$  = 2.0 Hz, 1 H), 8.83 (d,  $J$  = 1.7 Hz, 1 H), 8.50 (d,  $J$  = 9.5 Hz, 1 H), 7.88 (d,  $J$  = 2.7 Hz, 1 H), 7.67 (dd,  $J$  = 9.5, 2.8 Hz, 1 H), 3.95 (s, 3 H);  $^{13}\text{C}$  NMR (100 MHz, DMSO)  $\delta$  160.1, 142.6, 138.5, 129.4, 127.8, 125.5, 120.8, 120.2, 109.6, 56.1; HRMS (ESI) Calcd for  $\text{C}_{10}\text{H}_8\text{N}_2\text{NaO}_4$  [M+Na] 243.0376, Found 243.0365. [new compound]

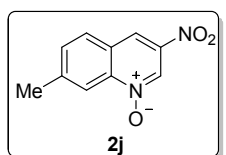

$^1\text{H}$  NMR (400 MHz,  $\text{CDCl}_3$ )  $\delta$  9.19 (d,  $J$  = 1.9 Hz, 1 H), 8.66 (d,  $J$  = 8.9 Hz, 1 H), 8.51 (d,  $J$  = 1.4 Hz, 1 H), 7.85 (s, 1 H), 7.79 (dd,  $J$  = 8.9, 1.7 Hz, 1 H), 2.61 (s, 3 H);  $^{13}\text{C}$  NMR (100 MHz,  $\text{CDCl}_3$ )  $\delta$  142.4, 142.0, 141.6, 136.1, 129.4, 129.3, 127.8, 120.4, 120.0, 21.5; HRMS (ESI) Calcd for  $\text{C}_{10}\text{H}_9\text{N}_2\text{O}_3$  [M+H] 205.0608, Found 205.0602. [new compound]

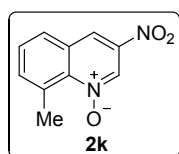

$^1\text{H}$  NMR (400 MHz,  $\text{CDCl}_3$ )  $\delta$  9.09 (d,  $J$  = 1.8 Hz, 1 H), 8.45 (d,  $J$  = 1.8 Hz, 1 H), 7.92–7.83 (m, 1 H), 7.61 (dd,  $J$  = 7.9, 5.4 Hz, 2 H), 3.17 (s, 3 H);  $^{13}\text{C}$  NMR (100 MHz,  $\text{CDCl}_3$ )  $\delta$  143.6, 141.3, 136.9, 134.5, 131.0, 130.0, 129.7, 129.2, 121.0, 24.4; HRMS (ESI) Calcd for  $\text{C}_{10}\text{H}_9\text{N}_2\text{O}_3$  [M+H] 205.0608, Found 205.0606. [new compound]

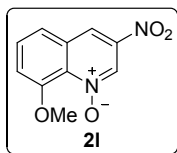

$^1\text{H}$  NMR (400 MHz,  $\text{CDCl}_3$ )  $\delta$  9.59 (d,  $J = 2.5$  Hz, 1 H), 8.98 (d,  $J = 2.5$  Hz, 1 H), 7.66 (t,  $J = 8.0$  Hz, 1 H), 7.59 (dd,  $J = 8.2, 1.0$  Hz, 1 H), 7.29–7.26 (m, 1 H), 4.13 (s, 3 H);  $^{13}\text{C}$  NMR (100 MHz,  $\text{CDCl}_3$ )  $\delta$  155.5, 142.6, 141.6, 141.5, 132.0, 129.3, 127.3, 121.1, 111.4, 56.3; HRMS (ESI) Calcd for  $\text{C}_{10}\text{H}_9\text{N}_2\text{O}_4$   $[\text{M}+\text{H}]$  221.0557, Found 221.0550. [new compound]

### Gram Scale Synthesis of 3-Nitroquinoline *N*-Oxide **2a**:

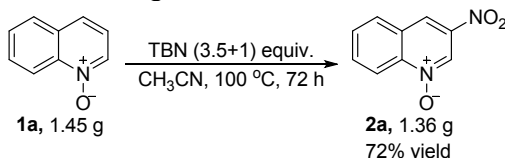

To a reaction kettle with a stir bar was added quinoline *N*-Oxide **1a** (10 mmol, 1.45 g), 30 mL of  $\text{CH}_3\text{CN}$  and TBN (35 mmol, 3.5 equiv.). The reaction mixture was stirred at 100 °C for 48 h, the quinoline *N*-Oxide **1a** did not react completely by TLC. Then additional TBN (10 mmol, 1 equiv.) was added to the reaction solution. The reaction mixture was stirred at 100 °C for another 24 h until the starting material **1a** disappear, cooled to room temperature, poured into brine and extracted with EtOAc. The combined extracts were dried over  $\text{MgSO}_4$ , filtered, and evaporated. The residue was purified by column chromatography (petroleum ether/EtOAc) to afford the desired product **2a** (1.36g, 72% yield).

### General Procedure for Transformations of 3-Nitroquinoline *N*-Oxide

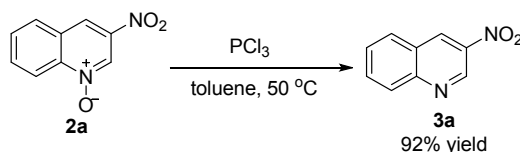

To a 15 mL pressure tube with a stir bar was added 0.3 mmol of 3-nitroquinoline *N*-oxide **2a**, 3 mL of toluene,  $\text{PCl}_3$  (0.6 mmol, 2 equiv.). The reaction mixture was stirred at 50 °C for 2 h, cooled to room temperature, poured into brine and extracted with EtOAc. The combined extracts were dried over  $\text{MgSO}_4$ , filtered, and evaporated. The residue was purified by column chromatography (petroleum ether/EtOAc) to afford the desired product **3a**<sup>[2]</sup> (48 mg, 92% yield).  $^1\text{H}$  NMR (400 MHz,  $\text{CDCl}_3$ )  $\delta$  9.65 (d,  $J = 2.6$  Hz, 1 H), 9.05 (d,  $J = 2.4$  Hz, 1 H), 8.24 (d,  $J = 8.2$  Hz, 1 H), 8.05 (d,  $J = 8.2$  Hz, 1 H), 7.95 (ddd,  $J = 8.5, 7.0, 1.4$  Hz, 1 H), 7.74 (ddd,  $J = 8.1, 7.0, 1.1$  Hz, 1 H);  $^{13}\text{C}$  NMR (100 MHz,  $\text{CDCl}_3$ )  $\delta$  150.1, 144.0, 140.9, 133.4, 132.3, 129.8, 129.8, 128.8, 126.0; HRMS (ESI) Calcd for  $\text{C}_9\text{H}_7\text{N}_2\text{O}_2$   $[\text{M}+\text{H}]$  175.0510, Found 175.0502.

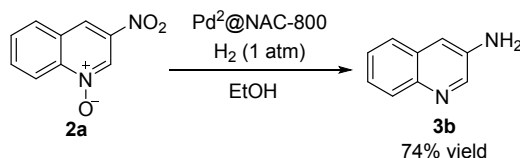

To a 25 mL Schlenk tubes with a stir bar was added 0.3 mmol of 3-nitroquinoline *N*-oxide **2a**, 3 mL of EtOH, Pd@NAC-800 (80 mg). Then the tube was sealed and pressurized with 1.0 atm  $\text{H}_2$  gas after it was vacuumed and flushed with  $\text{H}_2$  three times. The reaction mixture was stirred at room temperature for 12 h, poured into brine and extracted with EtOAc. The combined extracts were dried over  $\text{MgSO}_4$ , filtered, and evaporated. The residue was purified by column chromatography (petroleum ether/EtOAc) to afford the desired product **3b**<sup>[3]</sup> (32 mg, 74% yield).  $^1\text{H}$  NMR (400 MHz,  $\text{CDCl}_3$ )  $\delta$  8.50 (d,  $J = 2.7$

Hz, 1 H), 8.00–7.93 (m, 1 H), 7.59–7.56 (m, 1 H), 7.46–7.39 (m, 2 H), 7.21 (d,  $J = 2.9$  Hz, 1 H), 3.95 (s, 2 H);  $^{13}\text{C}$  NMR (100 MHz,  $\text{CDCl}_3$ )  $\delta$  143.1, 142.7, 139.7, 129.1, 129.0, 126.9, 125.8, 125.6, 114.9; HRMS (ESI) Calcd for  $\text{C}_9\text{H}_8\text{N}_2$  [ $\text{M}+\text{H}$ ] 145.0768, Found 145.0760.

### General Procedure for Radical Trapping Experiments:

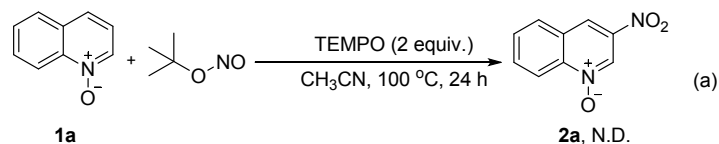

To a 15 mL pressure tube with a stir bar was added 0.3 mmol of quinoline *N*-Oxide **1a**, 3 mL of  $\text{CH}_3\text{CN}$ , TBN (1.05 mmol, 3.5 equiv.) and TEMPO (0.6 mmol, 2 equiv.). The reaction mixture was stirred at 100 °C for 24 h. And the desired **2a** was not detected by GC-MS.

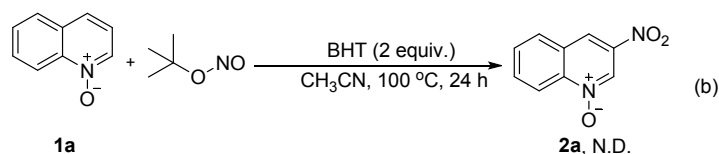

To a 15 mL pressure tube with a stir bar was added 0.3 mmol of quinoline *N*-Oxide **1a**, 3 mL of  $\text{CH}_3\text{CN}$ , TBN (1.05 mmol, 3.5 equiv.) and BHT (0.6 mmol, 2 equiv.). The reaction mixture was stirred at 100 °C for 24 h. And the desired **2a** was not detected by GC-MS.

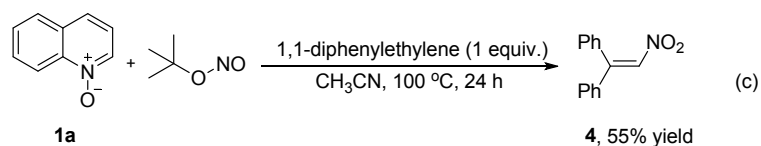

To a 15 mL pressure tube with a stir bar was added 0.3 mmol of quinoline *N*-Oxide **1a**, 3 mL of  $\text{CH}_3\text{CN}$ , TBN (1.05 mmol, 3.5 equiv.) and 1,1-diphenylethylene (0.3 mmol, 1 equiv.). The reaction mixture was stirred at 100 °C for 24 h, cooled to room temperature, and the desired **2a** was not detected by GC-MS. To our delight, we detected the nitroolefin **4**.<sup>[4]</sup> The reaction solution was poured into brine and extracted with EtOAc. The combined extracts were dried over  $\text{MgSO}_4$ , filtered, and evaporated. The residue was purified by column chromatography (petroleum ether/EtOAc) to afford compound **4** in 55% yield.  $^1\text{H}$  NMR (400 MHz,  $\text{DMSO}-d_6$ )  $\delta$  7.95 (s, 1 H), 7.50–7.42 (m, 6 H), 7.36–7.32 (m, 2 H), 7.24–7.19 (m, 2 H);  $^{13}\text{C}$  NMR (100 MHz,  $\text{CDCl}_3$ )  $\delta$  150.5, 137.0, 135.5, 134.4, 130.9, 129.3, 128.9, 128.84, 128.76, 128.5; HRMS (ESI) Calcd for  $\text{C}_{14}\text{H}_{11}\text{NnaO}_2$  [ $\text{M}+\text{Na}$ ] 243.0671, Found 243.0682.

**Reference:**

- [1] K. S. Sharma, S. Kumari and R. P. Singh, *Synthesis.*, 1981, 316.
- [2] H. Nakagawa, T. Higuchi, K. Kikuchi, Y. Urano and T. Naano, *Chem. Pharm. Bull.*, 1998, **46**, 1656.
- [3] S. Fantasia, J. Windisch and M. Scalone., *Adv. Synth. Catal.*, 2013, **355**, 627.
- [4] S. Maity, S. Manna, S. Rana, N. Togati, A. Mallick and D. Maiti, *J. Am. Chem. Soc.*, 2013, **135**, 3355.



# Copies of $^1\text{H}$ and $^{13}\text{C}$ NMR Spectra of the Products

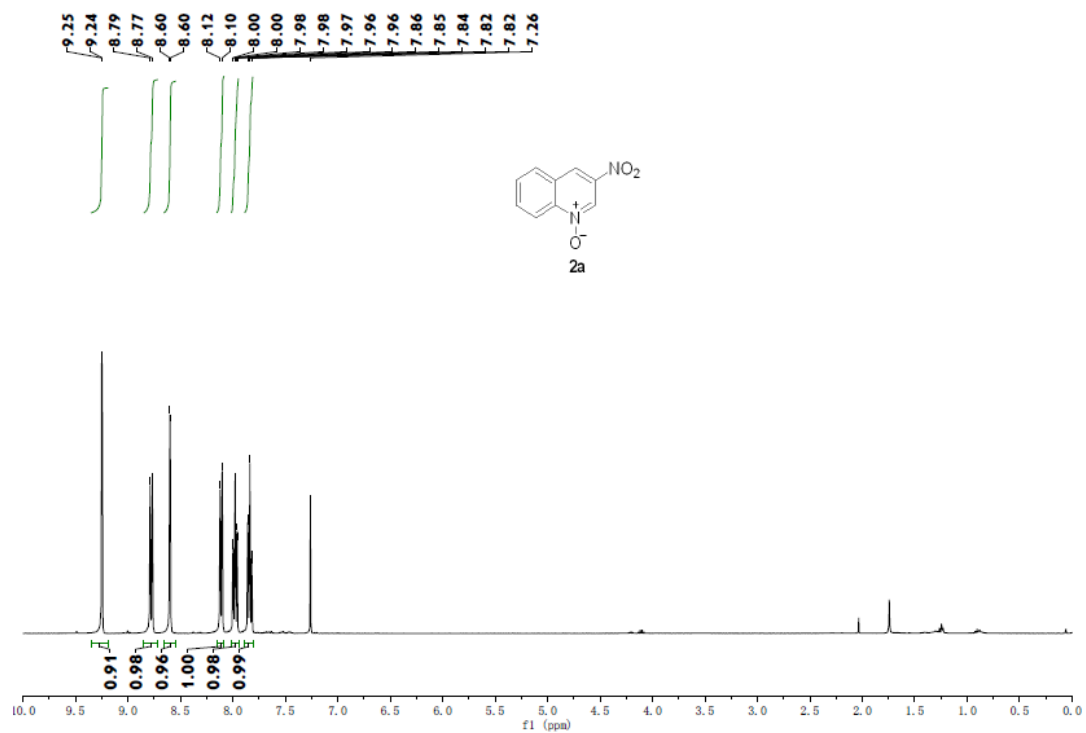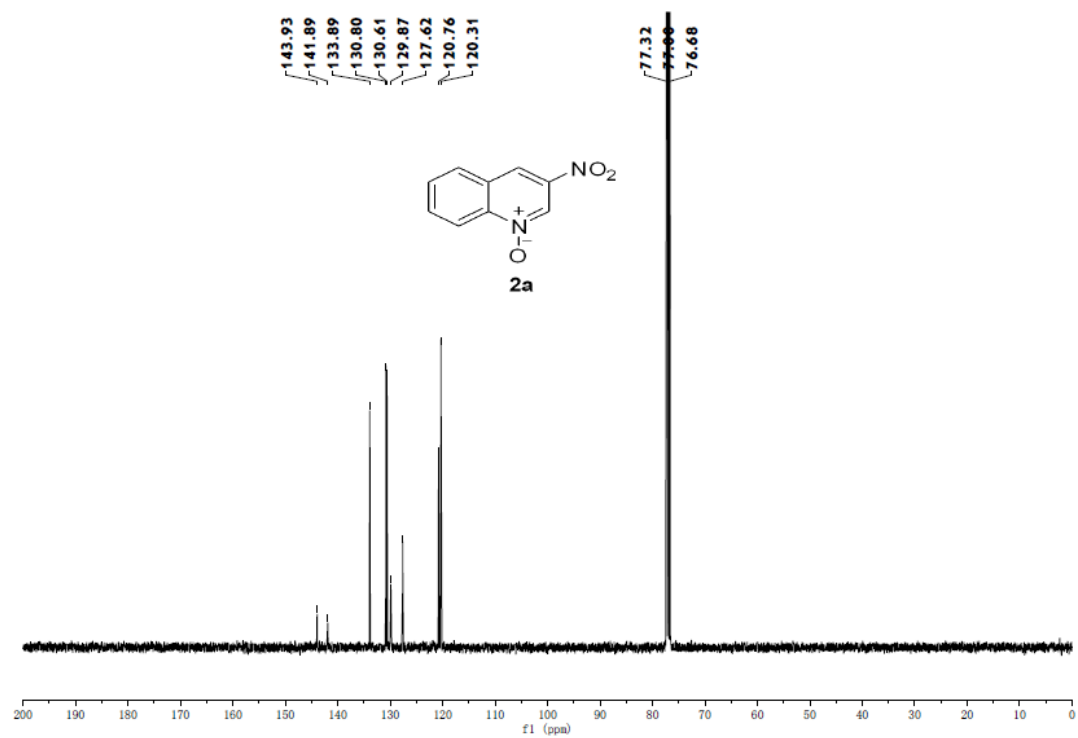

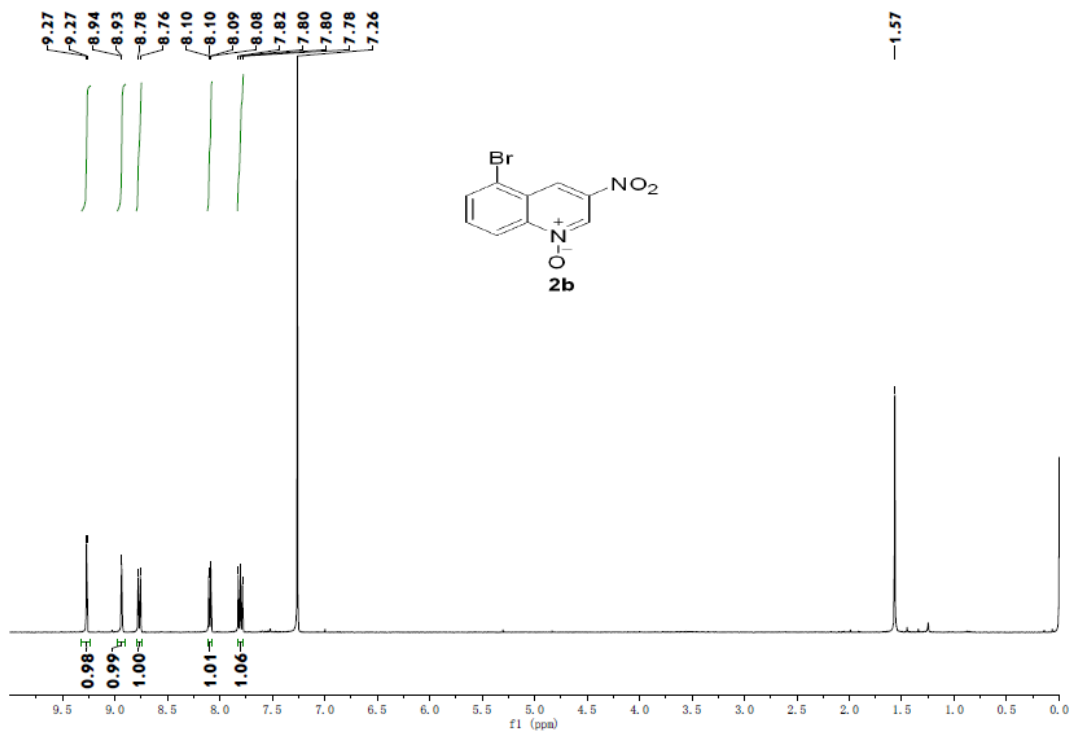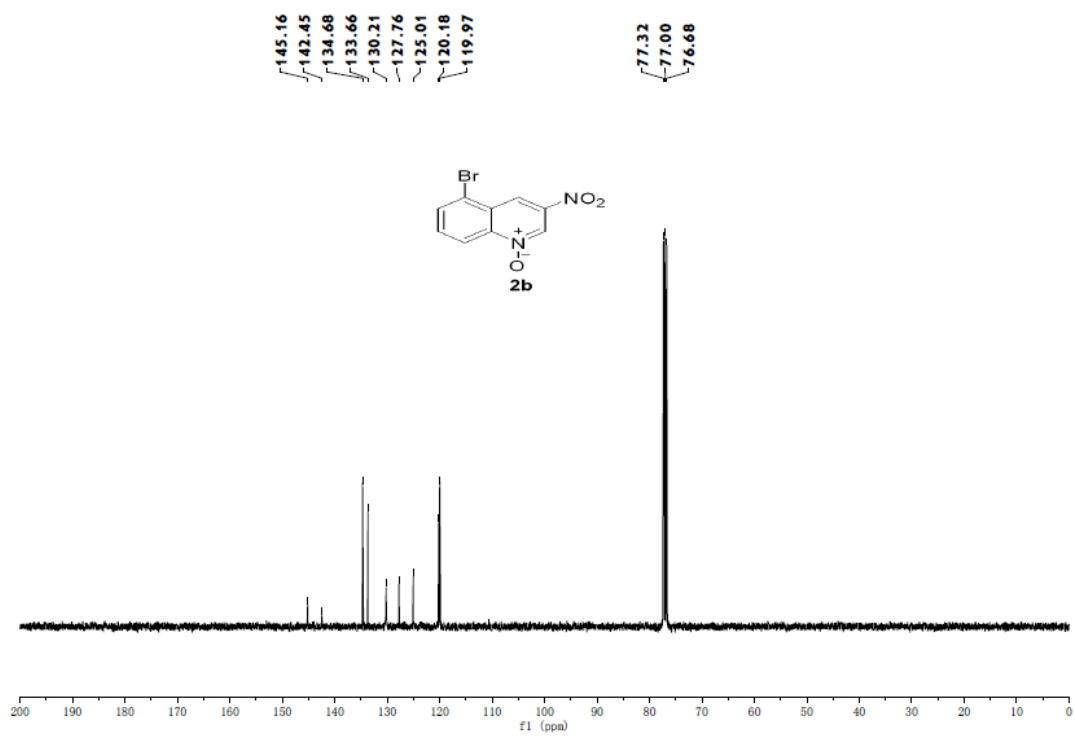

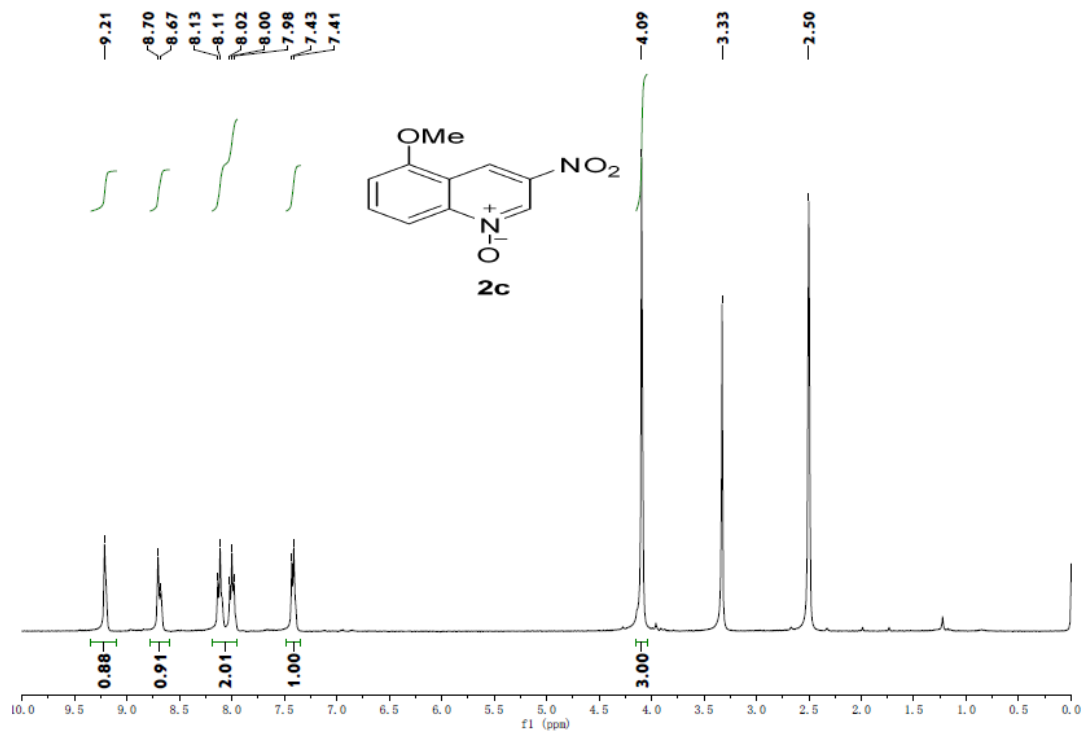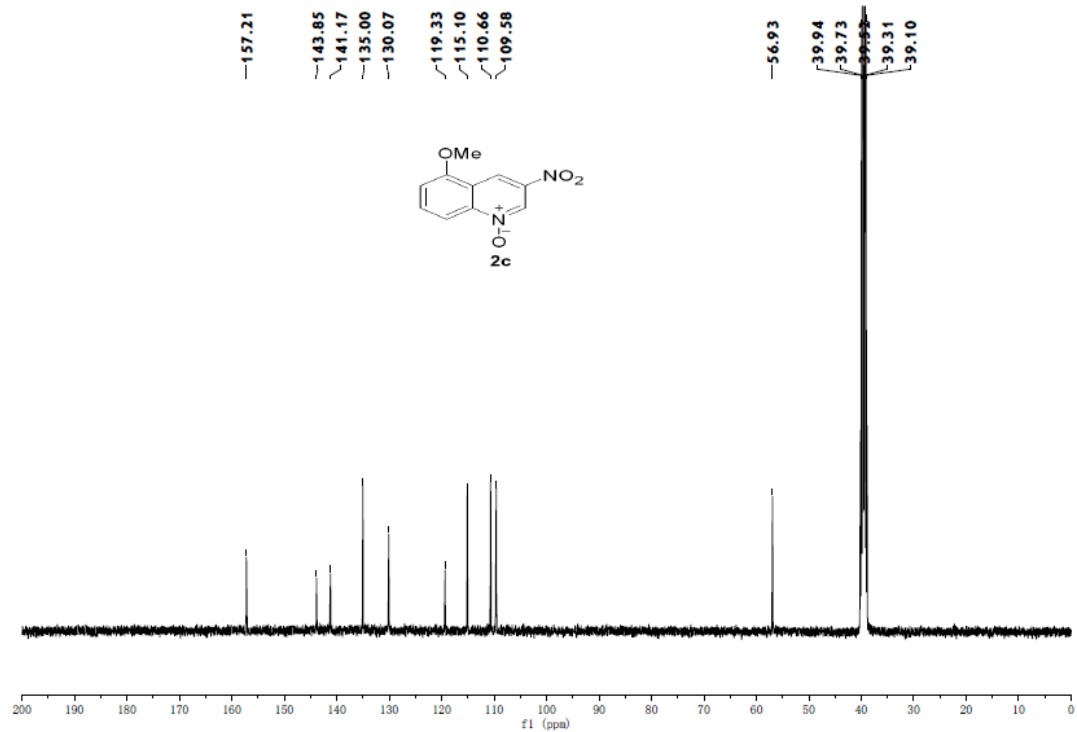

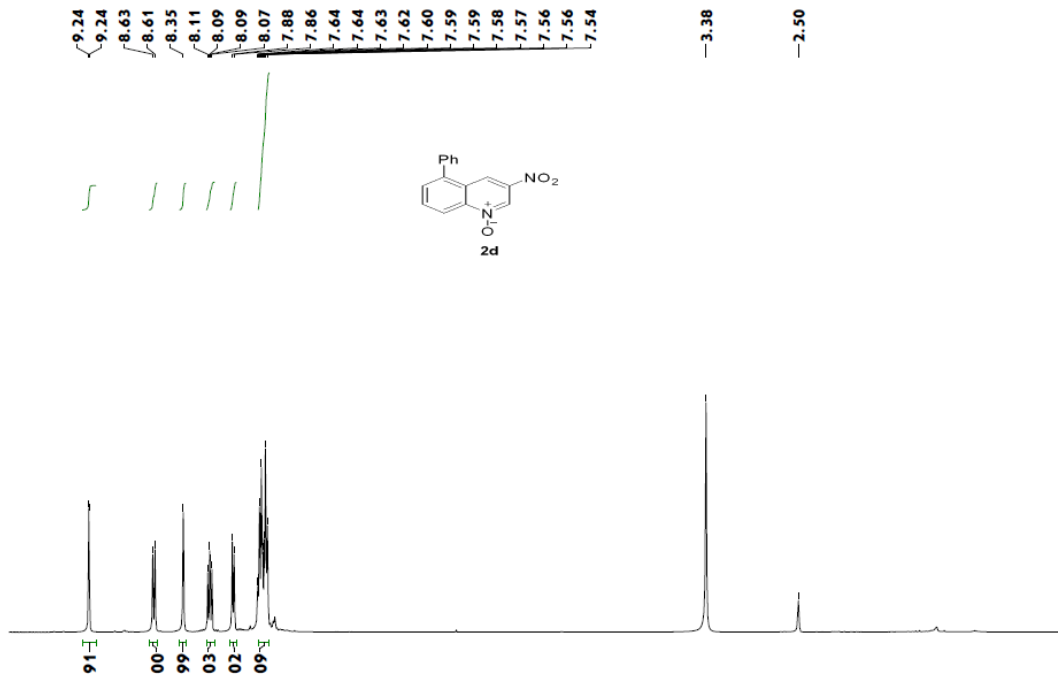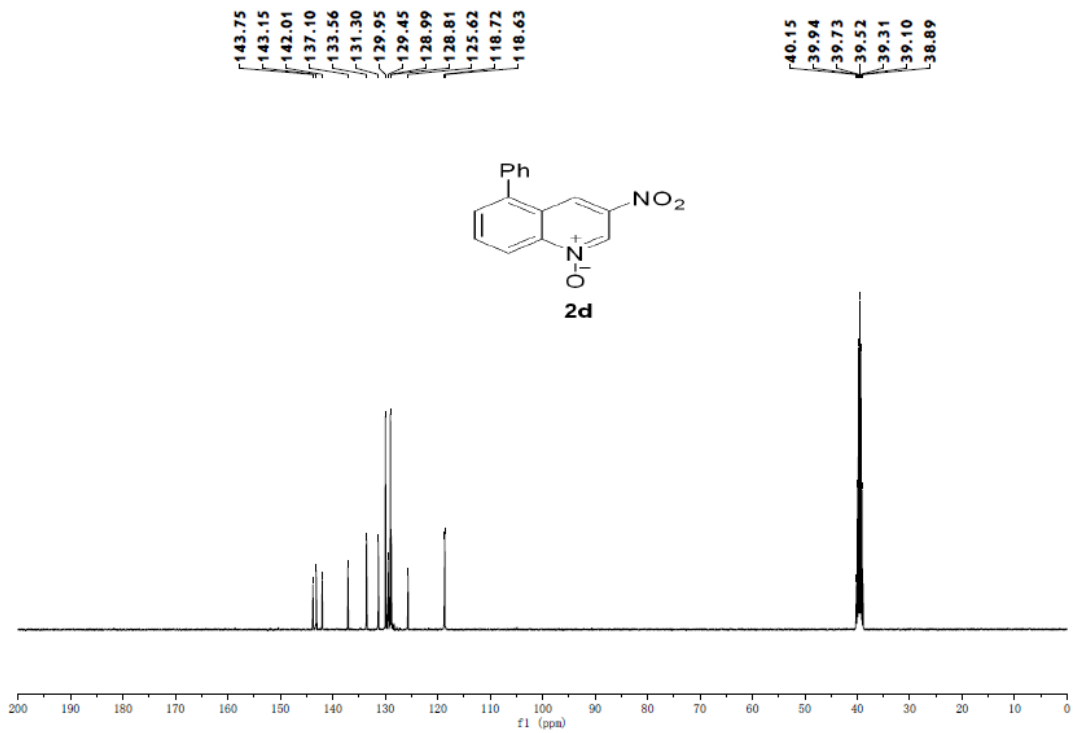

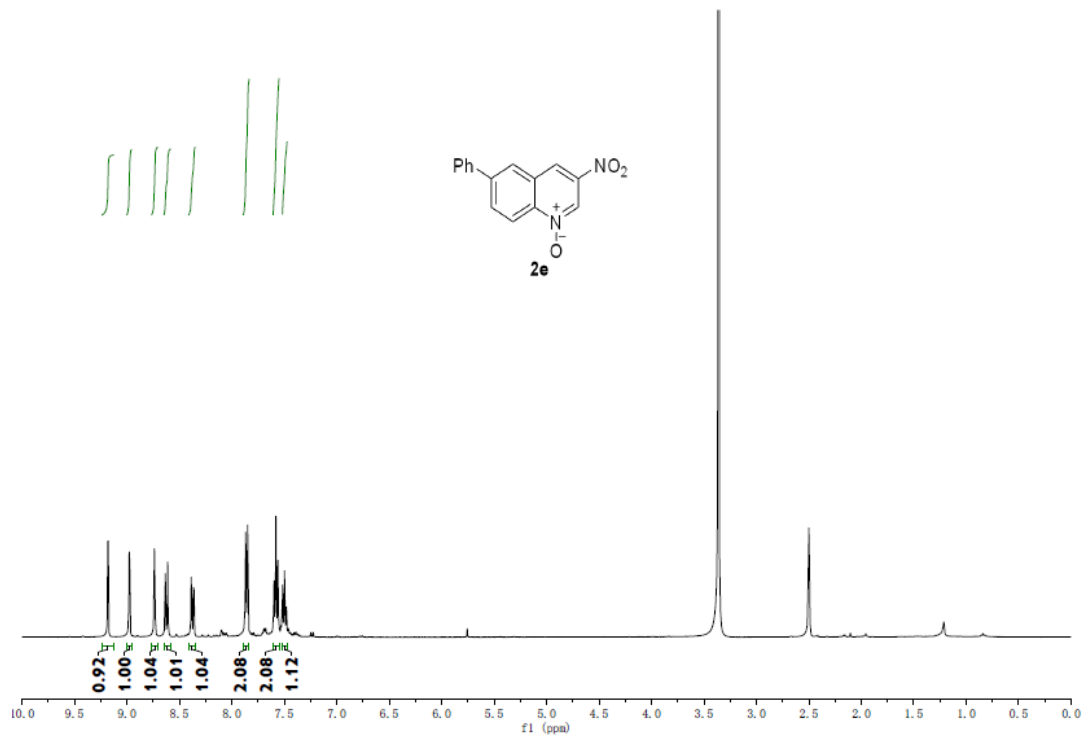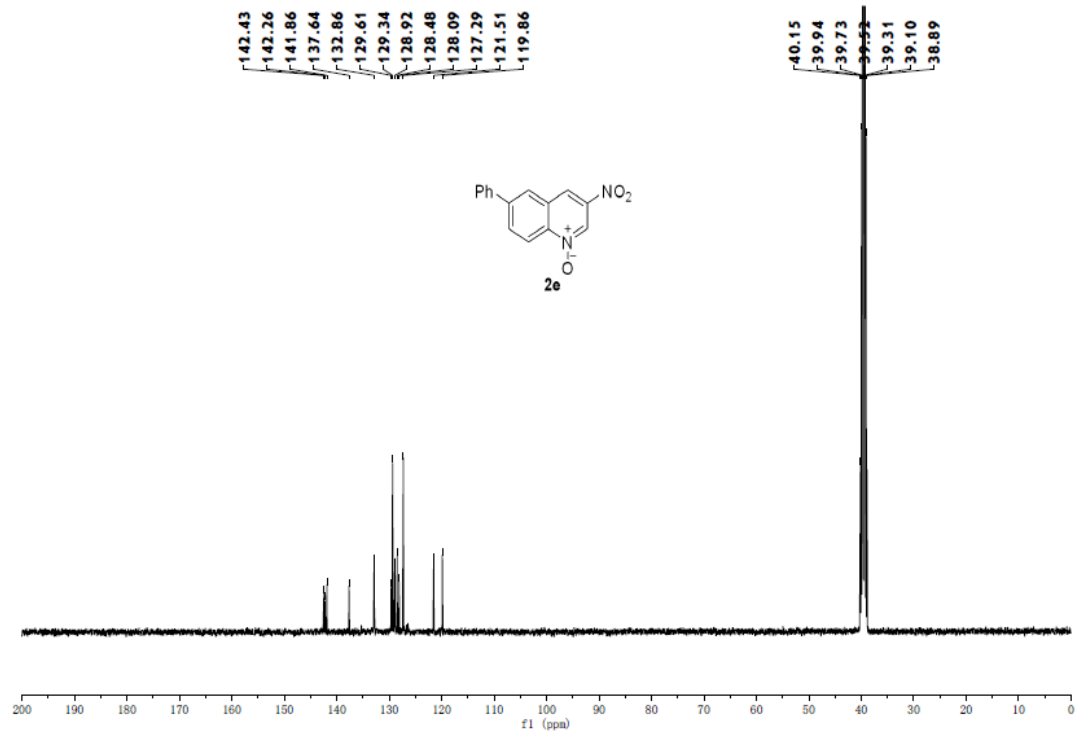

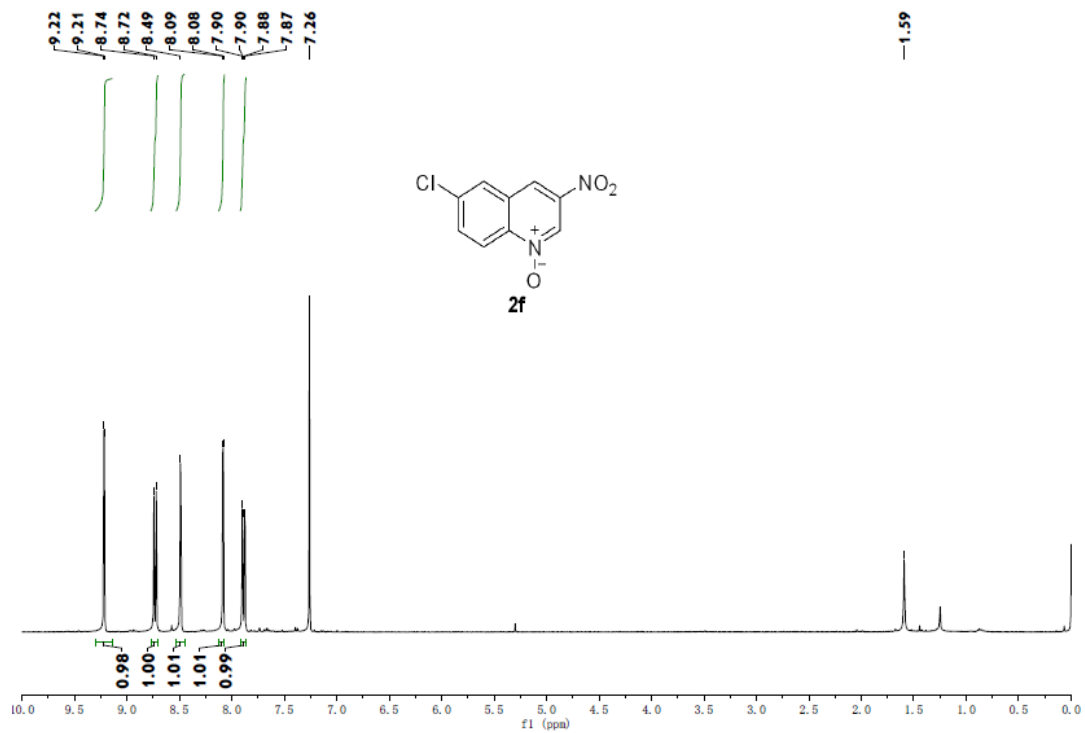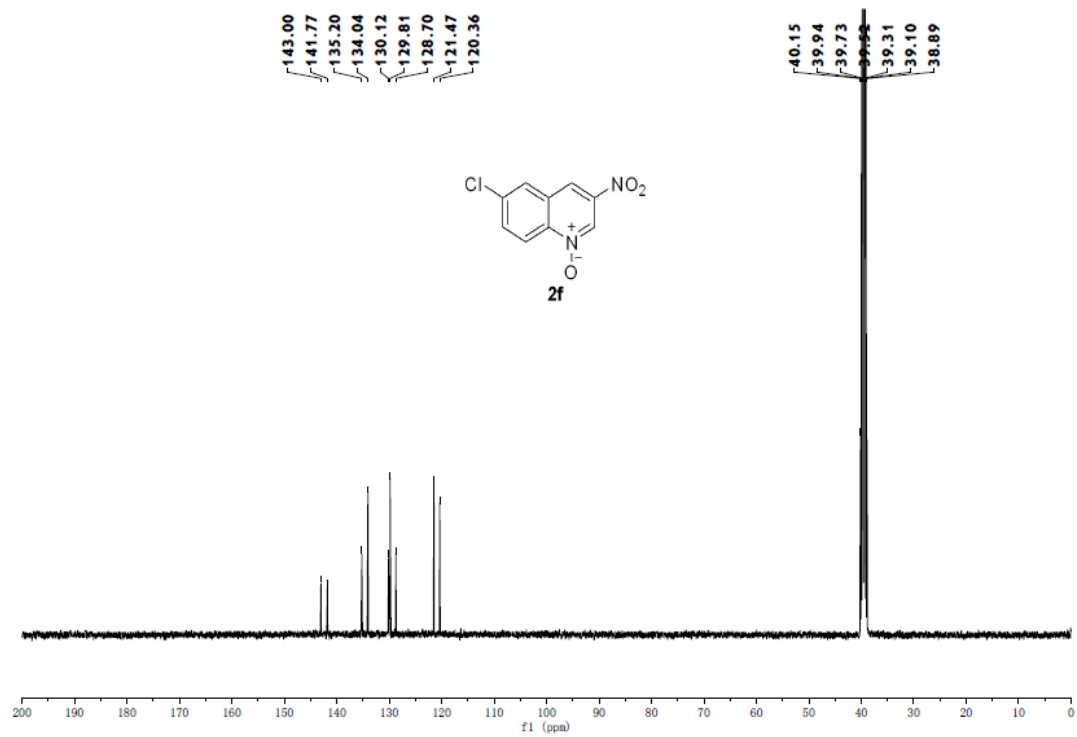

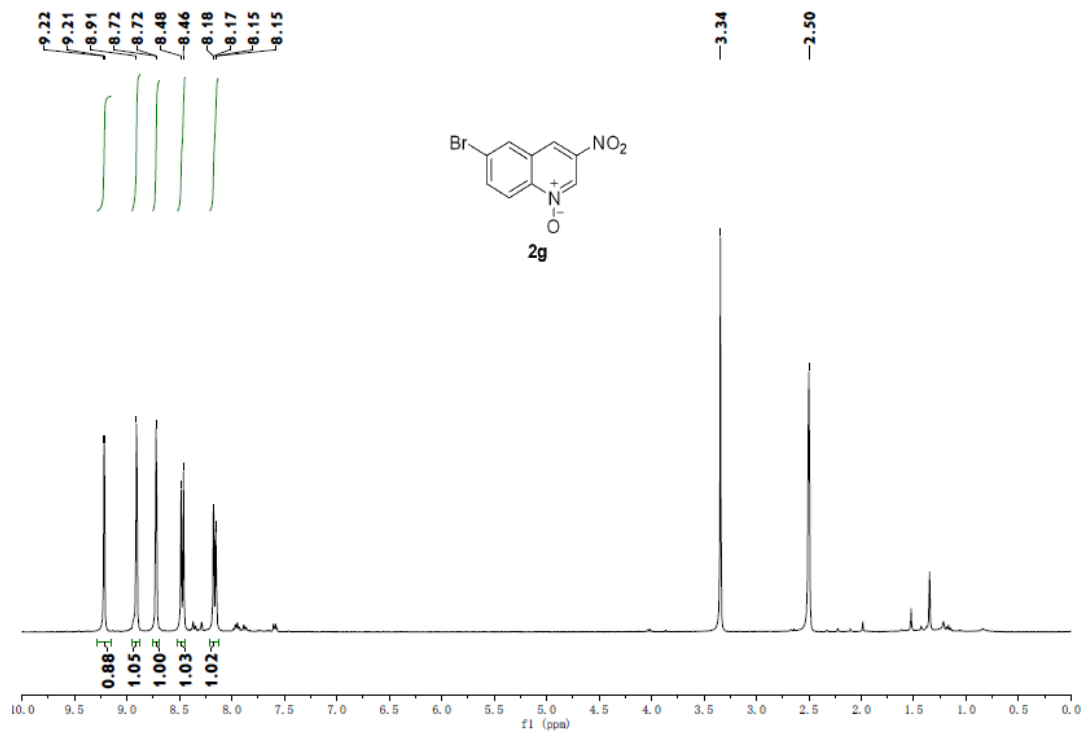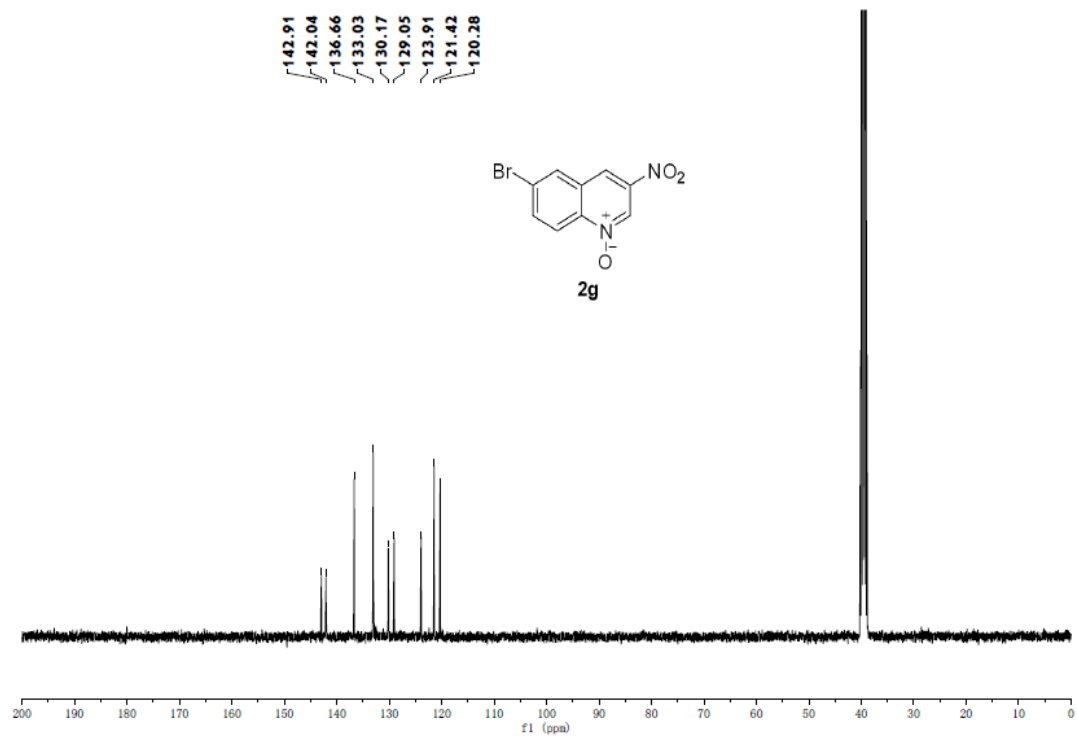

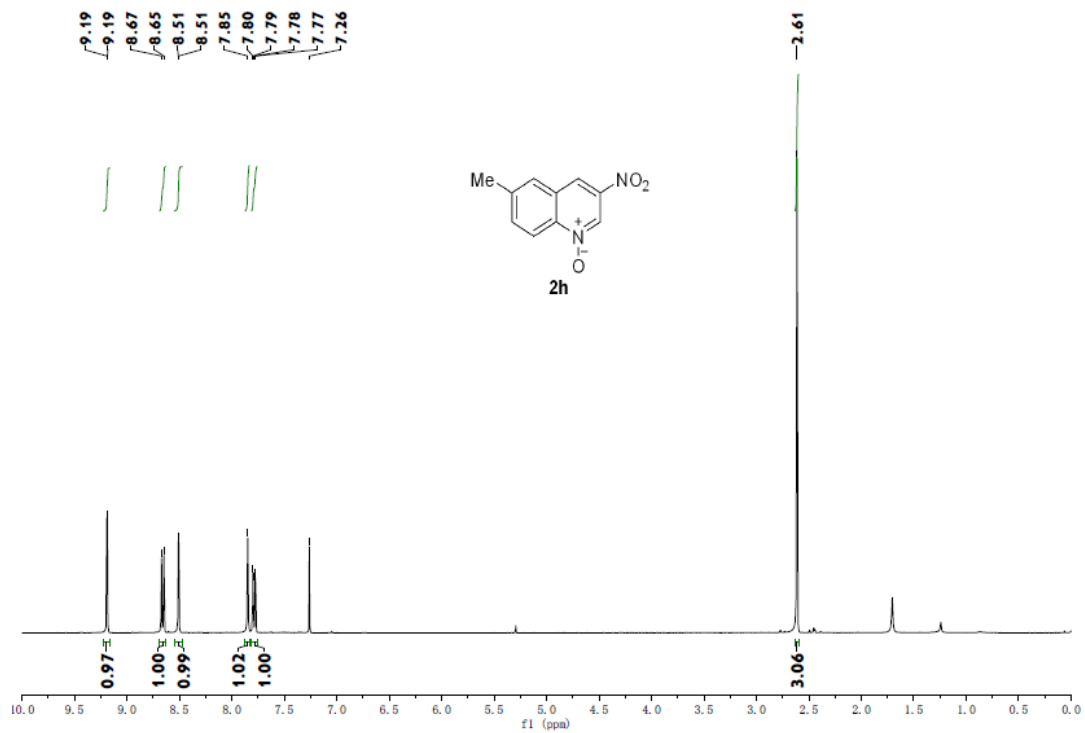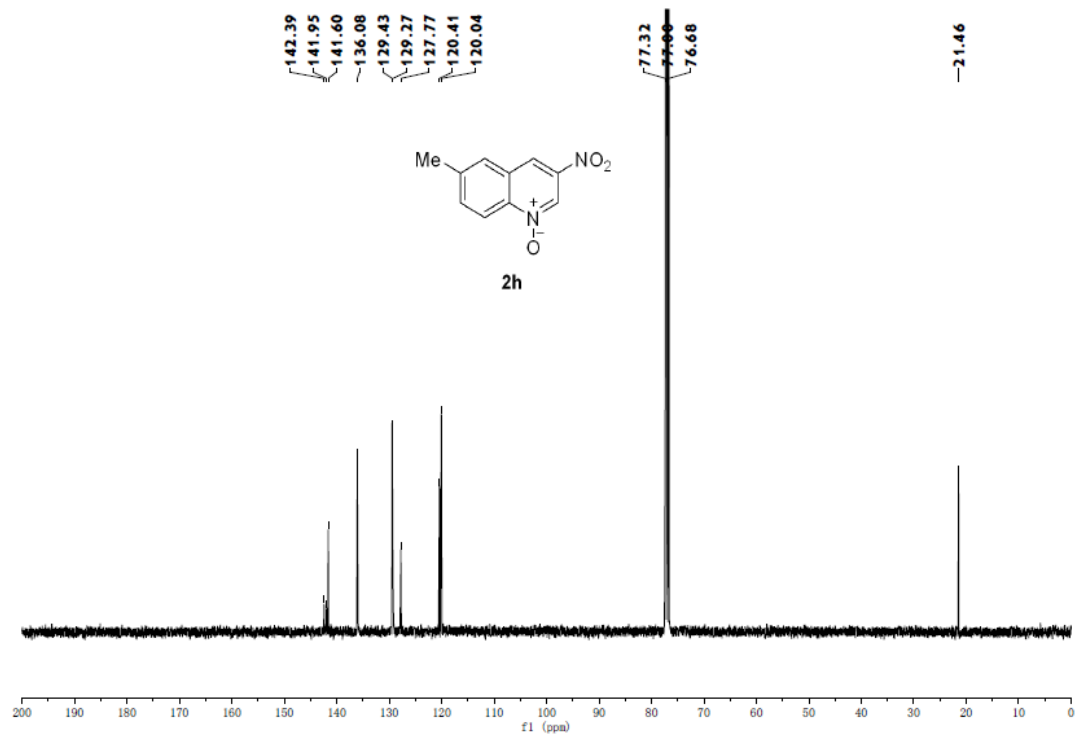



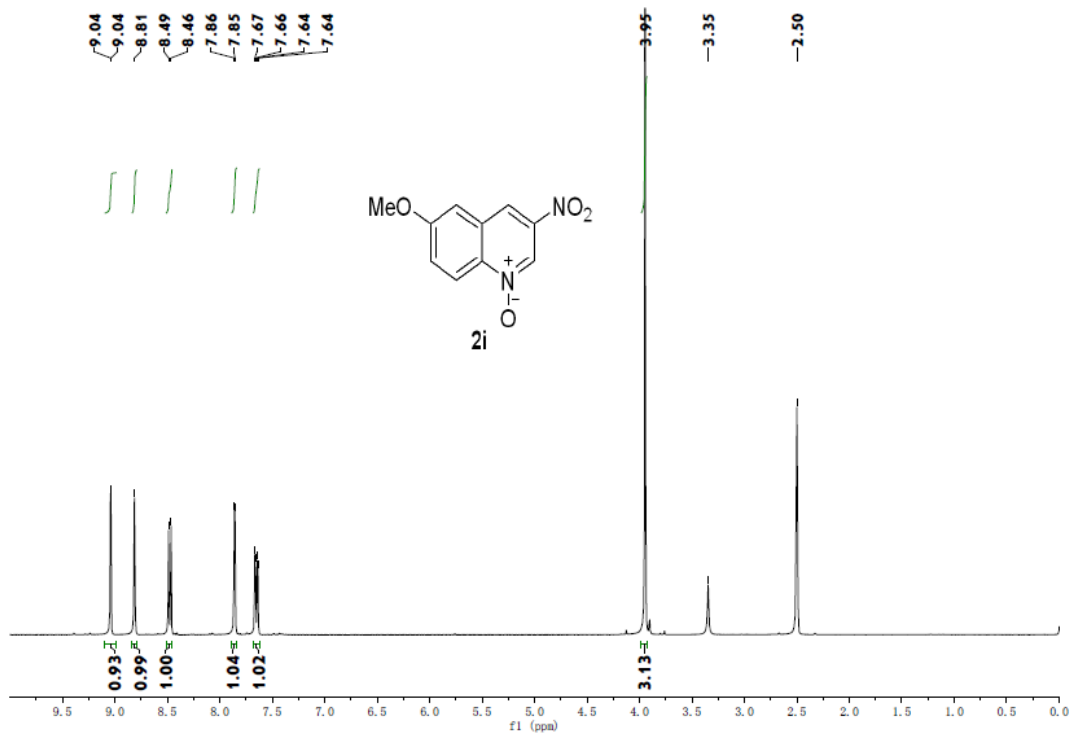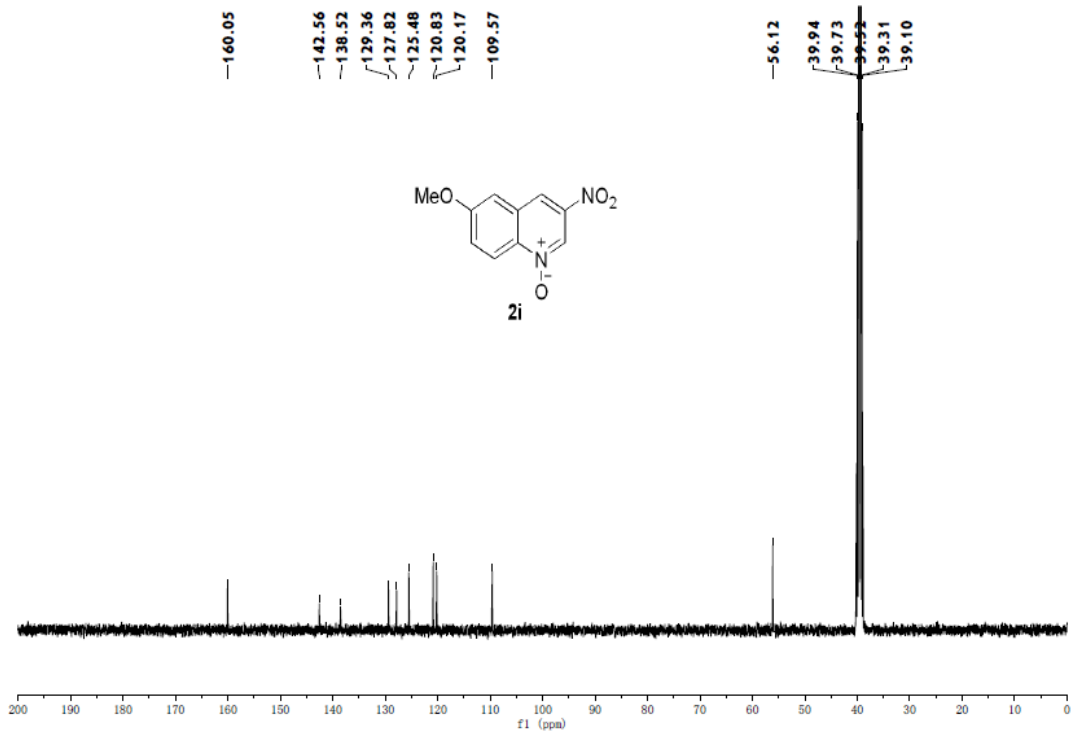

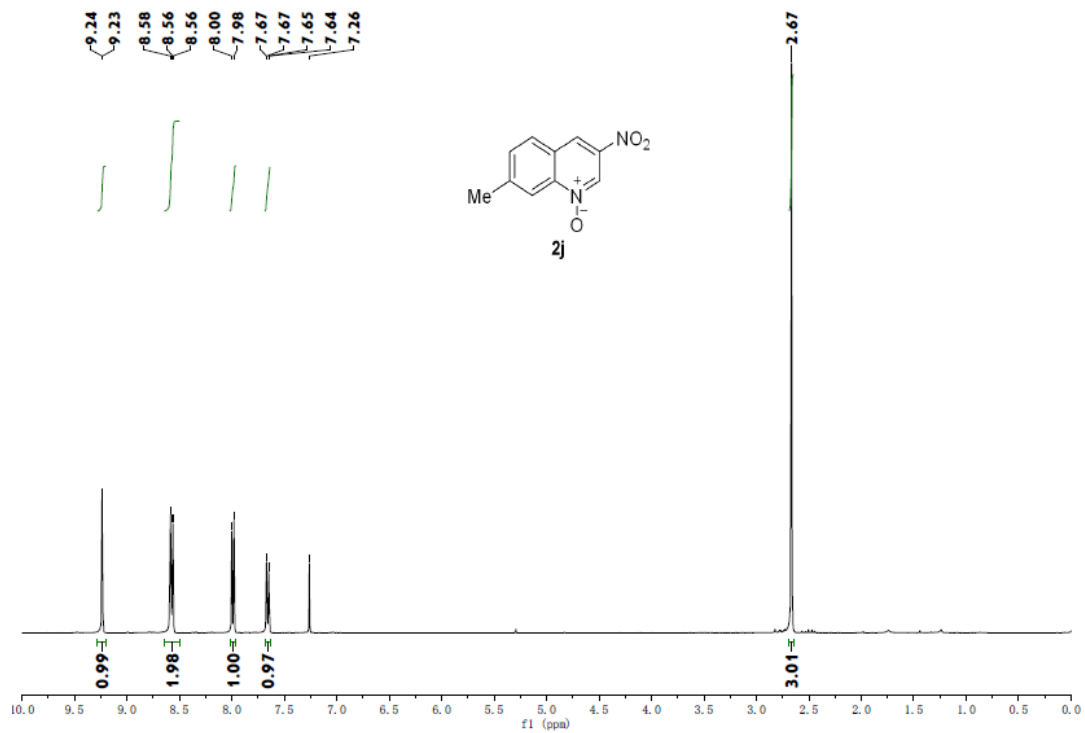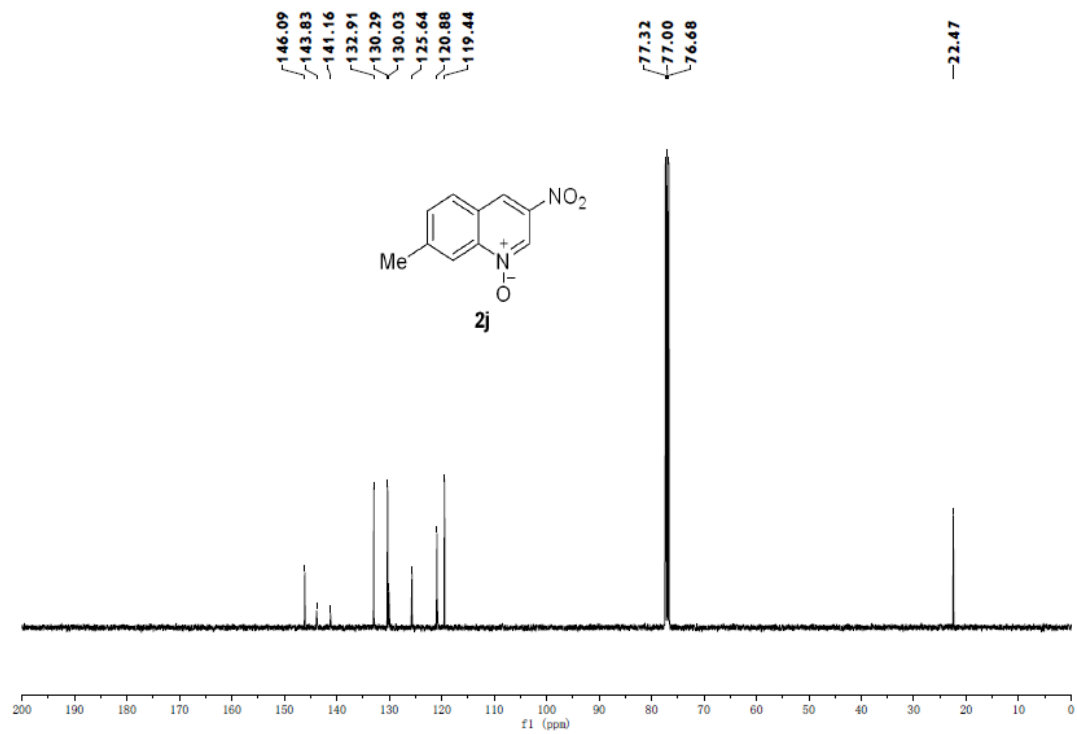

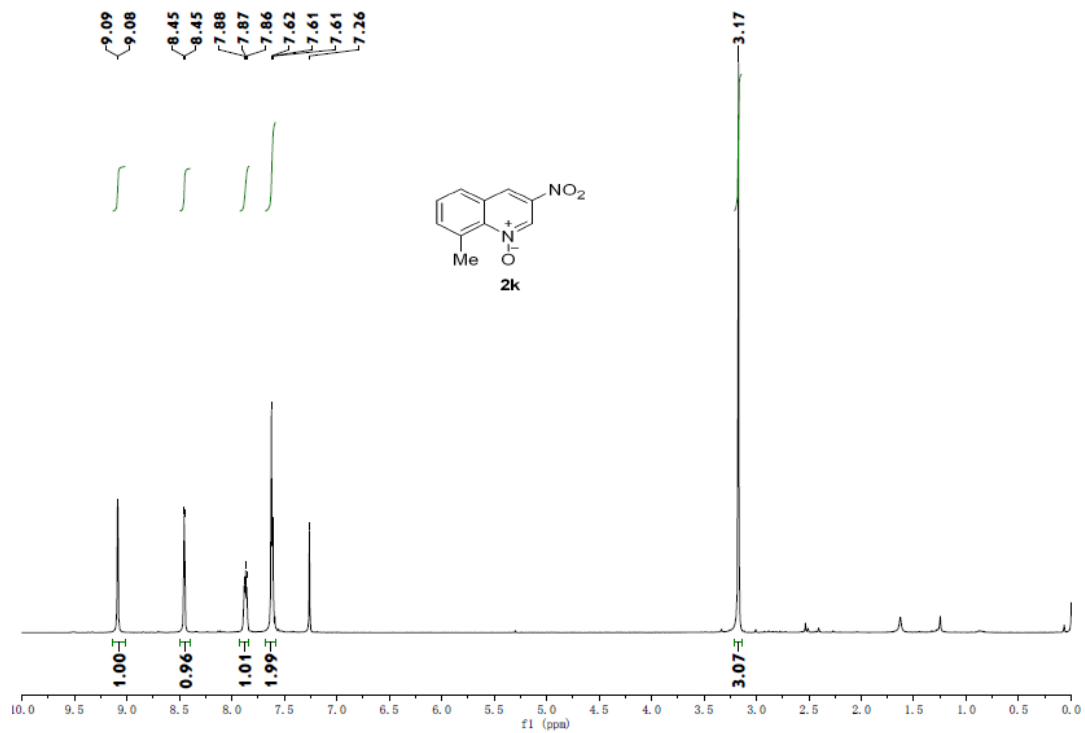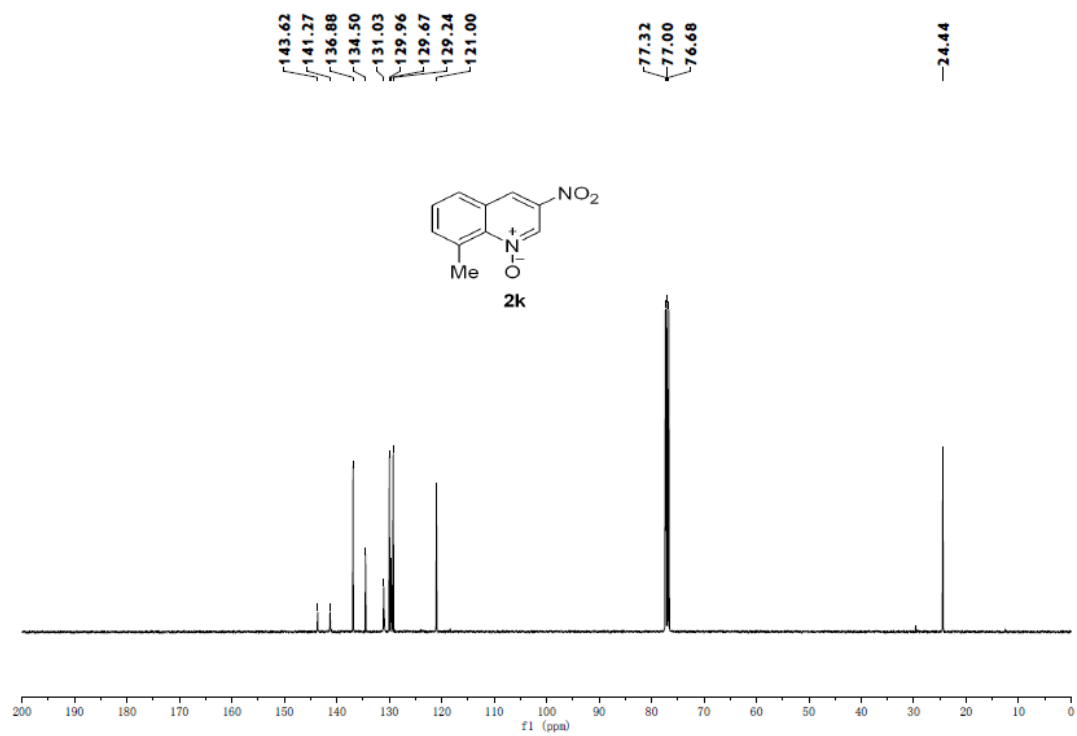

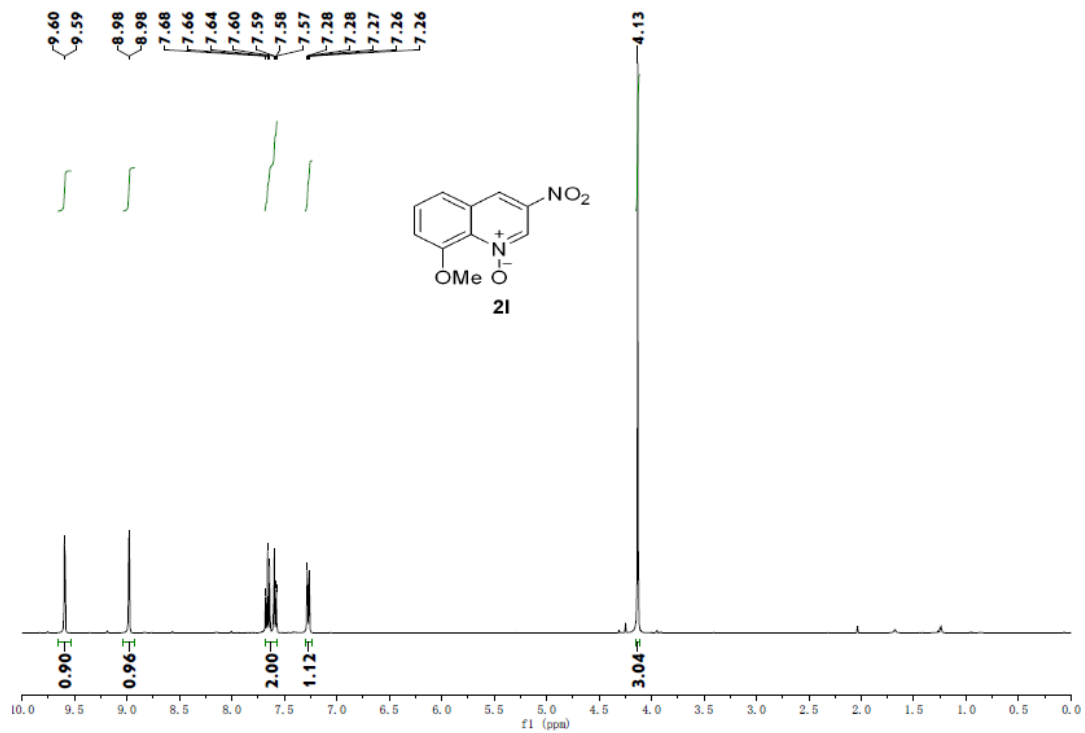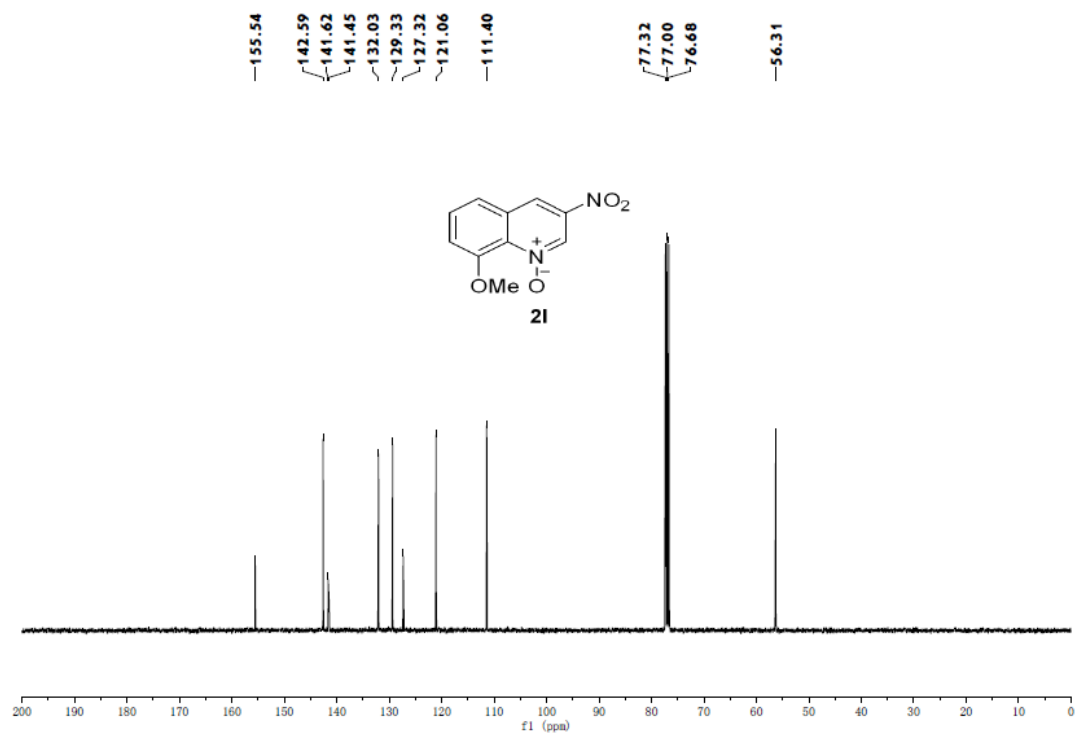

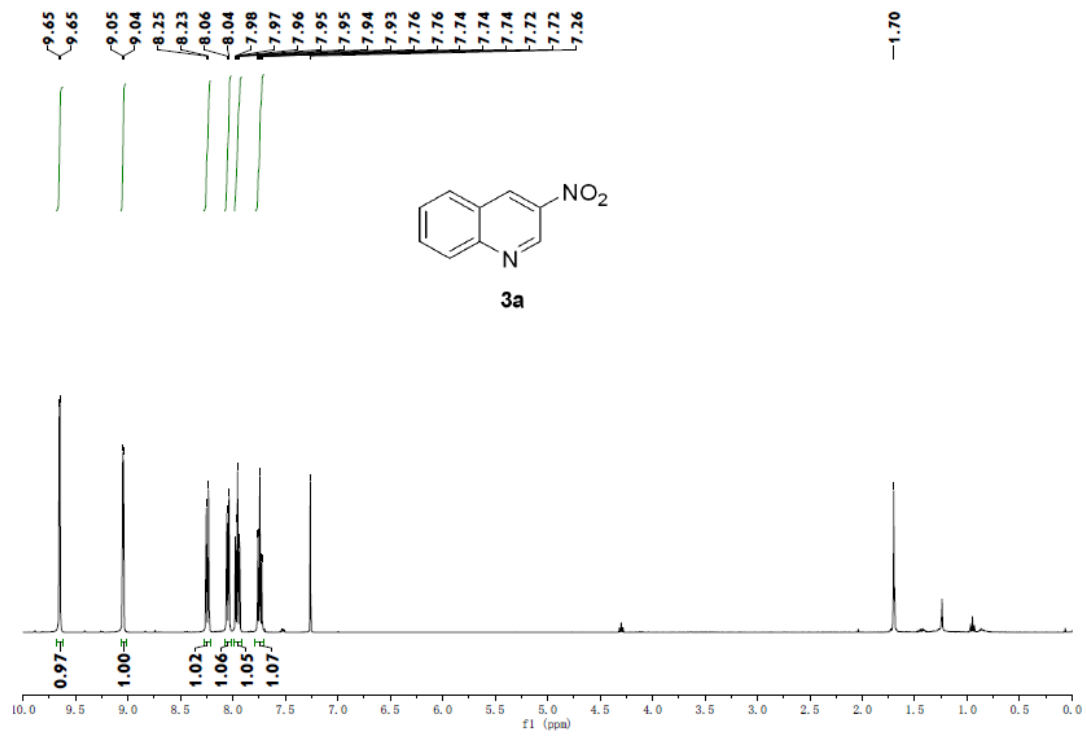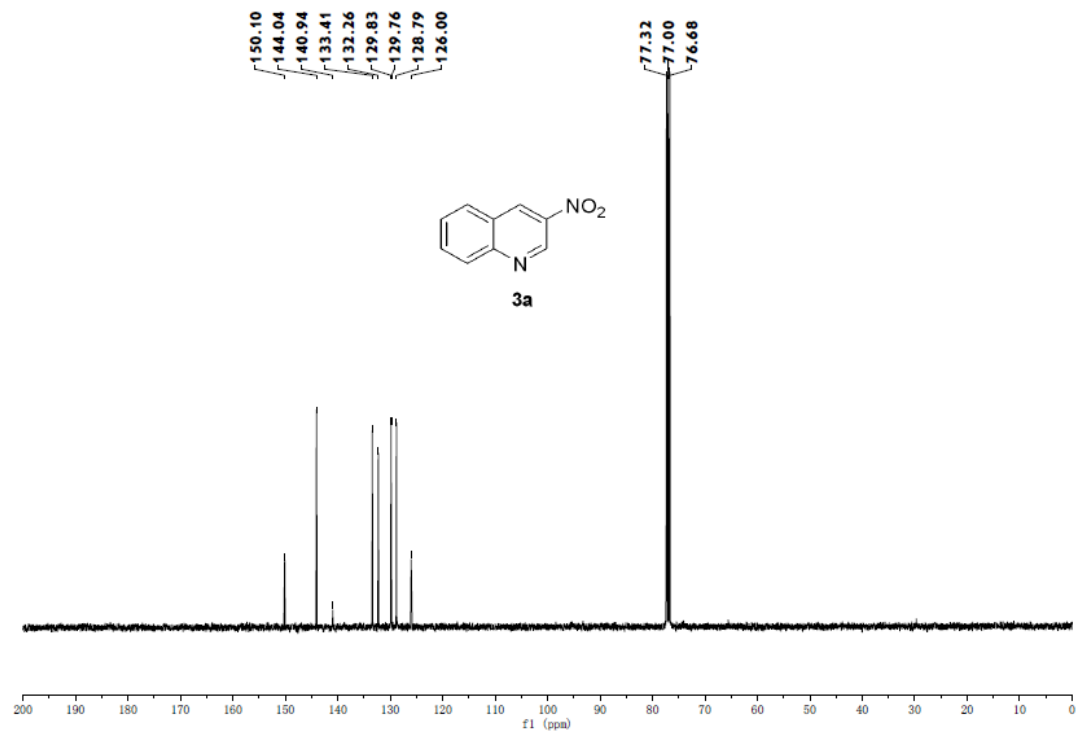

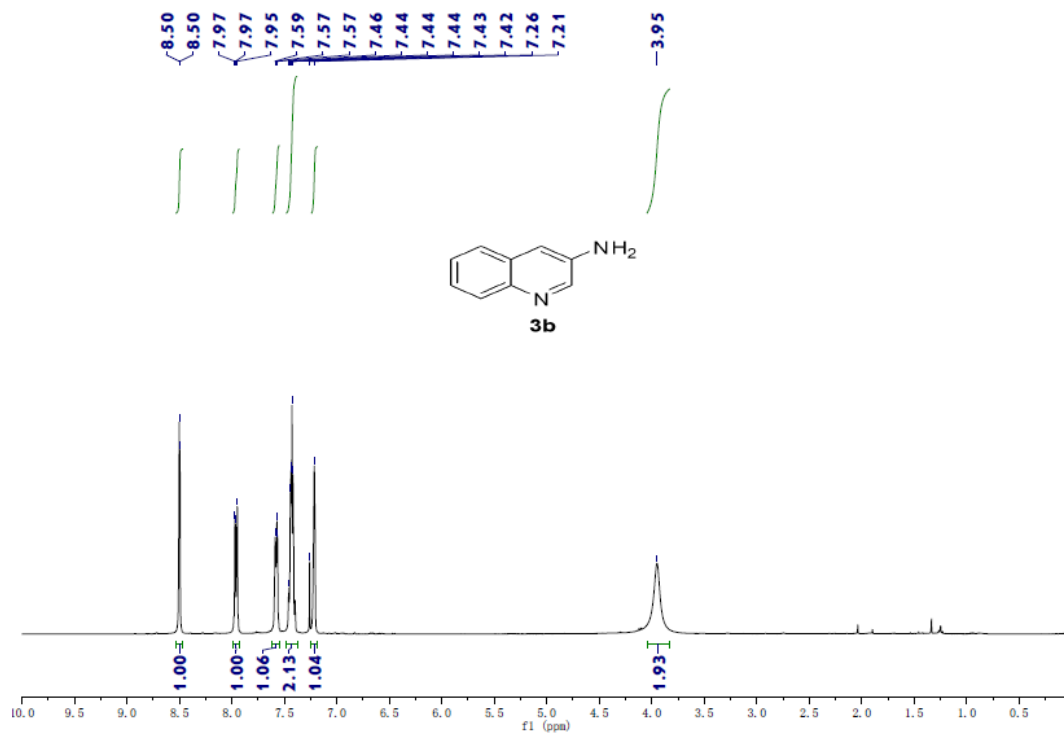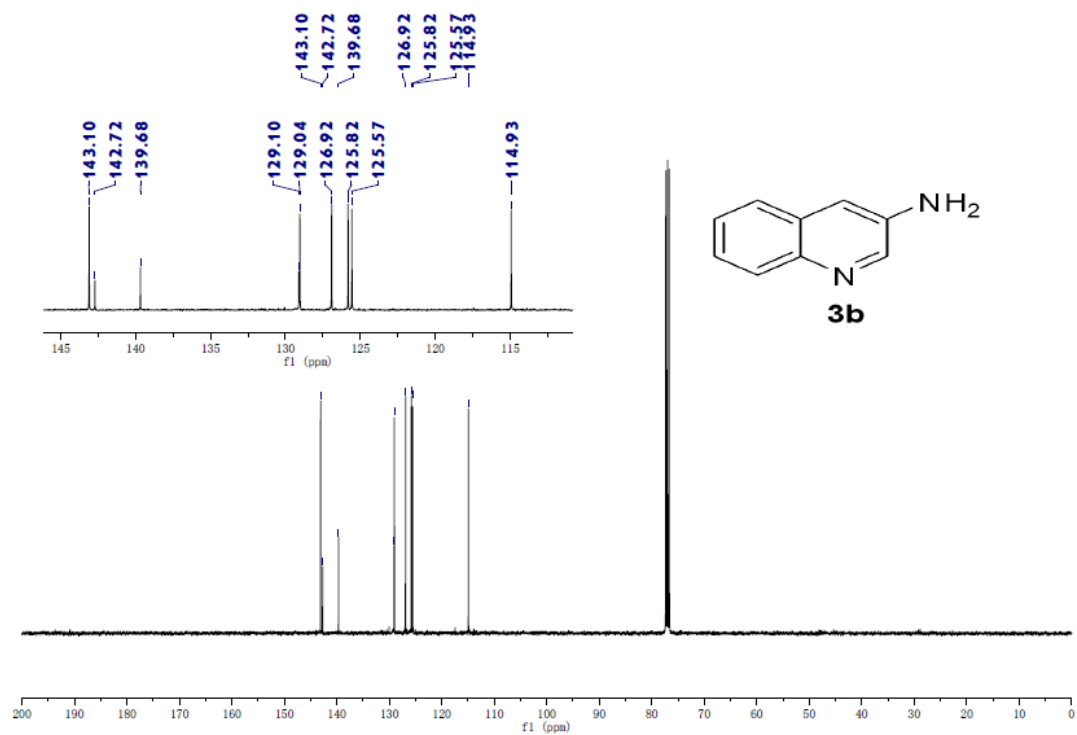

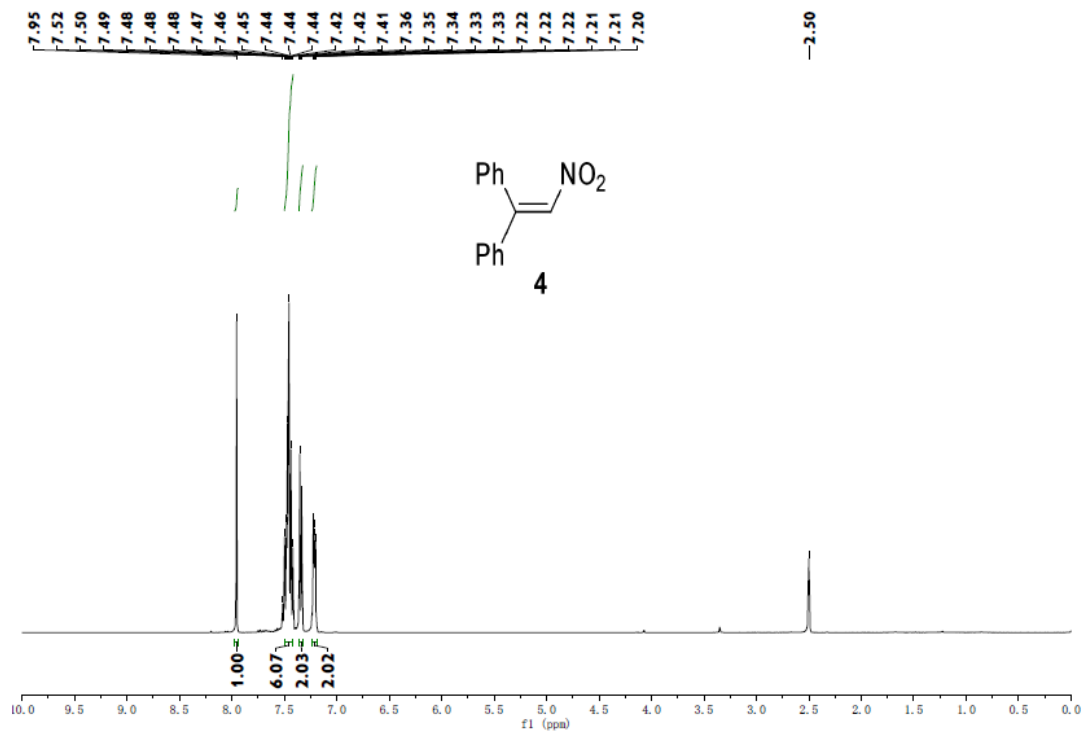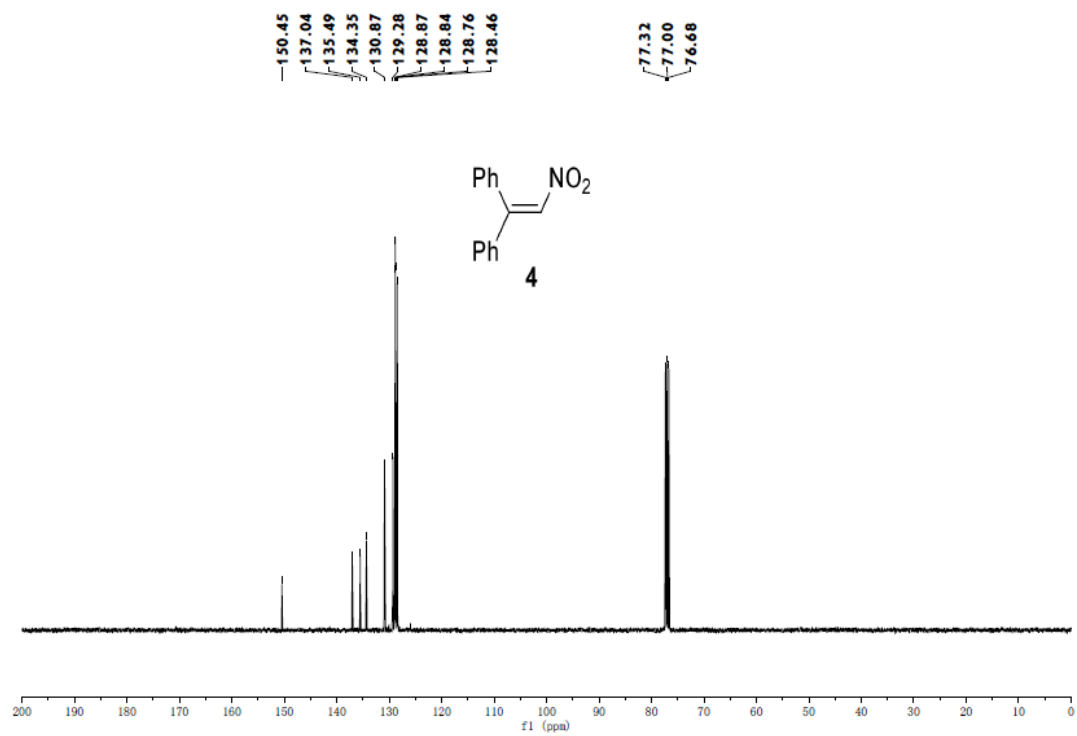

Supplement: c5ra04632g1.pdf [file c5ra04632g1.pdf]
